# Supplementary material for: Global Repertoire of Human Antibodies Against Plasmodium falciparum RIFINs, SURFINs, and STEVORs in a Malaria Exposed Population
Source: Front Immunol. 2020 May 12;11:893. doi: 10.3389/fimmu.2020.00893 (PMC7235171; doi:10.3389/fimmu.2020.00893)
Supplement: Supplementary file 1 [file Table_1.XLSX]

## Sheet: Table S1
Table S1: List of the recombinant RIFINs, STEVORs and SURFINS expressed in this study and their seroprevalence in Ugandan samples.
a. RIFINs and STEVORs expressed as one truncate. b. RIFINs and STEVORs expressed as two truncates. c. SURFINS Expressed
Product ID	GeneID	Product Description	Subtype	category	# TM Domains	Signal Peptide	Molecular Weight	Protein Length	Forward Primer	Reverse Primer	Expressed region	Seroprevalence (%)
a. RIFINs and STEVORs expressed as one truncate
RS1	PF3D7_0100200	rifin	A-type		1	**	37415	331	GGCGGATATCTCGAGATGATATATAATCAAAGGAACCATAAAAGCACCACA	CGGTACCCGGGATCCCTAATTGGAATAAGTAGTAAGACCAGGTGTTGCT	19-288	69.697
RS2	PF3D7_0100400	rifin	A-type		1	**	41887	372	GGCGGATATCTCGAGATGGTAAATACCCACAAAAAACCATCAAT	CGGTACCCGGGATCCCTAAGTATAGTAGGAAGTAGTTGCAGCTTCTACTTCGGCTAT	19-329	78.7879
RS4	PF3D7_0100800	rifin	A-type		1	**	39520	344	GGCGGATATCTCGAGATGGTGCATAATAAAAGGAACCATATGAAAACTA	CGGTACCCGGGATCCCTAATTAGTTAATATACTAGTATTTGTTGCTAATTTAAGACT	19-301	74.2424
RS5	PF3D7_0100900	rifin	A-type		1	Yes	38992	350	GGCGGATATCTCGAGATGAAGAAAACATCCATCACACCACTCCATAC	CGGTACCCGGGATCCCTAAGTCTGGTAACTGGCATATGTAGCTTTTACC	23-307	81.8182
RS6	PF3D7_0101000	rifin	A-type		1	Yes	39999	358	GGCGGATATCTCGAGATGCAAATGAACCATTACAATACAGCCCATATGAAAAACA	CGGTACCCGGGATCCCTAAGTCTGACAACCACCATATGTAGTGTTTACTTC	28-315	86.3636
RS7	PF3D7_0101600	rifin	A-type		1	**	41407	369	GGCGGATATCTCGAGATGGTATATAATCAAAGGAACTATTACATTACACCACG	CGGTACCCGGGATCCCTAAATCTGCCAACTAGTATATGTAGCATTTATCACAG	19-326	86.3636
RS11	PF3D7_0115200	rifin	A-type		1	**	41277	368	GGCGGATATCTCGAGATGGTATATAATCAAAGGAACTATTACATTACACCACG	CGGTACCCGGGATCCCTAAGTAATGGAACTTTCAAATCTACCTTCTATCAAA	19-325	7.57576
RS15	PF3D7_0115600	rifin	A-type		1	No	42304	379	GGCGGATATCTCGAGATGATATATAATCAAAGGAACCATAAAAGCACCACA	CGGTACCCGGGATCCCTAAGTCTGATAACTAGCATATGTAGTAGTTACCTCACC	19-336	50
RS16	PF3D7_0200200	rifin	A-type		1	Yes	37798	334	GGCGGATATCTCGAGATGGTATATAATCAAAGGAACCATTACATCACACG	CGGTACCCGGGATCCCTAACTGTACAAATGTGCACTTTCTTCATTTATCAA	24-291	51.5152
RS20	PF3D7_0200500	rifin	A-type		1	No	41064	370	GGCGGATATCTCGAGATGGAACATAATAAAAATGAACCACACACCACAC	CGGTACCCGGGATCCCTAAGTAATGGAACTTTCAAATCTACCTTCTATCAAA	19-327	72.7273
RS21	PF3D7_0200600	rifin	A-type		1	Yes	41267	375	GGCGGATATCTCGAGATGAATAAAAATAAACAATACATCTCAGCACG	CGGTACCCGGGATCCCTAACTAATGGAACTATTAAATCCAGCTTCTAACAAAC	26-332	63.6364
RS22	PF3D7_0200700	rifin	A-type		1	**	37139	330	GGCGGATATCTCGAGATGGTATATAATCAAAGGAGCTATTACATTACACCACG	CGGTACCCGGGATCCCTAAGTAGAATAAGCACCAGCTGATGTTGTTACC	19-287	57.5758
RS25	PF3D7_0201200	rifin	A-type		1	Yes	39919	356	GGCGGATATCTCGAGATGGGGCACTATAGTAGCACTAAACATCCTATATCAAGCAC	CGGTACCCGGGATCCCTAATTAGAAAAAATAGCTGATGTACTTGTTGCCTC	23-313	31.8182
RS30	PF3D7_0222600	rifin	A-type		1	No	41049	368	GGCGGATATCTCGAGATGGAACATAATGAAAGGGACCATAACAACACTAC	CGGTACCCGGGATCCCTAAGTTGTGCAACTGTTAAATCCAGCTTCTATCA	19-325	62.1212
RS37	PF3D7_0223400	rifin	A-type		1	**	36427	327	GGCGGATATCTCGAGATGATATATAATCAAAGGAACCATAAAAGCACCACA	CGGTACCCGGGATCCCTAATTTGTTAACGTAAGAGTTTTTGGTGCC	19-284	10.6061
RS38	PF3D7_0300200	rifin	A-type		1	**	37325	326	GGCGGATATCTCGAGATGATATATAATCAAAGGAACCATTACATCACACG	CGGTACCCGGGATCCCTAAGTATTTAAACCACTAGTAACAGGTGCTGCTTT	19-283	37.8788
RS42	PF3D7_0300700	rifin	A-type		1	Yes	40767	368	GGCGGATATCTCGAGATGCCATCCAGCACACCACGTCATATACAAACTAC	CGGTACCCGGGATCCCTAACTAATGGAACTGTTAAATCCAGCTTCTAACAAACGAGT	25-325	39.3939
RS43	PF3D7_0300800	rifin	A-type		1	Yes	36457	321	GGCGGATATCTCGAGATGAGGAATCATAACAACAGCACATATCATACATCAAA	CGGTACCCGGGATCCCTAATTAGTTAAAAATGTTGTTGGAGTTGTTGCC	23-280	28.7879
RS50	PF3D7_0324800	rifin	A-type		1	Yes	41279	371	GGCGGATATCTCGAGATGGTATATAATCAAAGGAACCATTACATGAAACCACA	CGGTACCCGGGATCCCTAAGTTTGGTAACCCATATAAGTAGCTGCTATCTCAC	24-328	33.3333
RS51	PF3D7_0400300	rifin	A-type		1	**	41205	370	GGCGGATATCTCGAGATGATATATAATCAAAGGAACCATAAAAGCACTAACC	CGGTACCCGGGATCCCTAAGTAATGGAACTGTTAAATCCAGCTTCTATCAAA	19-327	43.9394
RS52	PF3D7_0400500	rifin	A-type		1	**	42510	382	GGCGGATATCTCGAGATGGTAAATACCCACAAAAAACCATCCAT	CGGTACCCGGGATCCCTAAGTTTGCTTACTCATAAATATAGTATTTATCACTTCGG	19-339	40.9091
RS53	PF3D7_0400700	rifin	A-type		1	**	42314	380	GGCGGATATCTCGAGATGATATATAATCAAAGGAACCATAAAAGCACCACA	CGGTACCCGGGATCCCTAAGTAATGGAACTGTTAAATCCAGCTTCTATCAAA	19-337	37.8788
RS56	PF3D7_0400900	rifin	A-type		1	**	37365	329	GGCGGATATCTCGAGATGGTAAATACCCACAAAAAATCATCCATAAGACG	CGGTACCCGGGATCCCTAAGTAGTTAAACTACTAGTTACACTGGCTCCCTCTT	19-286	25.7576
RS58	PF3D7_0401200	rifin	A-type		1	**	41000	367	GGCGGATATCTCGAGATGGTAAATACCCACAAAAAACCATCCATCTC	CGGTACCCGGGATCCCTATGCAACGATAGATGCTATTATAGGAGTATAGTAAGGA	19-332	46.9697
RS59	PF3D7_0401300	rifin	A-type		1	**	41708	375	GGCGGATATCTCGAGATGGATCATAAACAAAGGAACCATAACAGCACC	CGGTACCCGGGATCCCTAAGTTGTGGAACTGTCAAATCCAGCTTCTATC	19-332	36.3636
RS60	PF3D7_0401400	rifin	A-type		1	Yes	37036	329	GGCGGATATCTCGAGATGAACCATAACAACAGCACATATCATACATCAAA	CGGTACCCGGGATCCCTAATCAGAAAAAATAGTACCAACACTTGTCATCTCT	24-286	25.7576
RS63	PF3D7_0413200	rifin	A-type		1	Yes	41651	376	GGCGGATATCTCGAGATGGTATATAATCAAAAAAATCCATACCTCACACCAC	CGGTACCCGGGATCCCTAACTGTACGTATTAGCACCTGCAGATGCTATTTTAC	24-333	45.4545
RS64	PF3D7_0413300	rifin	A-type		1	Yes	38631	346	GGCGGATATCTCGAGATGGTGCATAATAAAAAAAATCCATACATAATAACATCA	CGGTACCCGGGATCCCTAATTAGTTAATGTAGCAGTAGAAGATGCTGAGTTAGC	26-303	40.9091
RS67	PF3D7_0425700	rifin	A-type		1	**	36354	324	GGCGGATATCTCGAGATGGTAAATACCCACAAAAAACCACACACCA	CGGTACCCGGGATCCCTAATCAGAAAAAATGGTACCCACACTTGTCA	19-281	40.9091
RS68	PF3D7_0425900	rifin	A-type		1	**	36430	324	GGCGGATATCTCGAGATGATATATAATCAAAGGAACCATTACATCACACG	CGGTACCCGGGATCCCTAATTAGTTAATATAGTAGTTTTTGGTACAAATTTGGCAAC	19-281	45.4545
RS69	PF3D7_0500400	rifin	A-type		1	**	41778	374	GGCGGATATCTCGAGATGATAAATGACCATAGTAAATATAGCAGCTGTAAACATAC	CGGTACCCGGGATCCCTAAGTCTGCTTACTCATAAATATAGTATTTATCGCAGC	19-331	33.3333
RS73	PF3D7_0600300	rifin	A-type		1	**	41309	371	GGCGGATATCTCGAGATGATATATAATCAAAGGAACCATAACAGCACCAC	CGGTACCCGGGATCCCTAGGTGTACAACTGCATACTTGCAGCTTCTATA	19-328	25.7576
RS74	PF3D7_0600500	rifin	A-type		1	Yes	41558	372	GGCGGATATCTCGAGATGAAAAAACCACACACCACAGCACG	CGGTACCCGGGATCCCTAATAGTAAGTAGTAGTTGCAGCATCTATAGCTTCTGTG	23-328	24.2424
RS75	PF3D7_0600700	rifin	A-type		1	**	38658	349	GGCGGATATCTCGAGATGATATATAATCAAAGGAACCATAACAGCACCAC	CGGTACCCGGGATCCCTAAGTCTGGCAACCACCATATGTAGATTCTA	19-306	33.3333
RS78	PF3D7_0617700	rifin	A-type		1	Yes	37344	331	GGCGGATATCTCGAGATGGTAAATGACCAAAGTAACTATGTCAACATTACTCATCA	CGGTACCCGGGATCCCTAATTAGAAAAAATAGCACCAGAGTTTGTTA	26-288	33.3333
RS82	PF3D7_0632000	rifin	A-type		1	Yes	41368	370	GGCGGATATCTCGAGATGCCCCAAAAAAATCCATCCATCATAAC	CGGTACCCGGGATCCCTAAGTATGGTAACCCATACAAGTAGTTTCTAT	22-327	33.3333
RS83	PF3D7_0632100	rifin	A-type		1	**	36586	323	GGCGGATATCTCGAGATGGTAAATAATCAAAGGAATCATAACAACAGCACATA	CGGTACCCGGGATCCCTAATTAGTTAAAAATGTTGTTGGAGTTGTTGCC	19-280	19.697
RS87	PF3D7_0632400	rifin	A-type		1	**	41786	377	GGCGGATATCTCGAGATGATATATAATCAAAGGAACCATAAAAGCACCACA	CGGTACCCGGGATCCCTAAGTGTGGTAACCTGCATATGTAGCTTCT	19-334	34.8485
RS88	PF3D7_0632700	rifin	A-type		1	**	42286	376	GGCGGATATCTCGAGATGATATATAATCAAAGGAACCATTACATCACACG	CGGTACCCGGGATCCCTAAGTTTGGTAACCCATATATGTAGCGTTTACCT	19-333	34.8485
RS89	PF3D7_0700200	rifin	A-type		1	Yes	36349	323	GGCGGATATCTCGAGATGAGGAACCATAAGAAAACTATACTTCATACACCCAAAAC	CGGTACCCGGGATCCCTAATCAGTTAAGAATGTTGTTATTGTTGTAGAATCAGAAAA	23-280	27.2727
RS94	PF3D7_0700500	rifin	A-type		1	Yes	39980	357	GGCGGATATCTCGAGATGGTAAATGTCCATAGGAAGCATTACAGCATT	CGGTACCCGGGATCCCTAAGTTTGGTAACCTCCATATGCAGTGTTTA	25-314	33.3333
RS95	PF3D7_0701100	rifin	A-type		1	**	37736	329	GGCGGATATCTCGAGATGATATATAATCAAAGGAACCATTACATCACACG	CGGTACCCGGGATCCCTAAGTATTTAAACCACTAGTAACAGGTGCTGCTTTT	19-286	31.8182
RS96	PF3D7_0701800	rifin	A-type		1	Yes	37013	331	GGCGGATATCTCGAGATGCATGTAAATGATCAAAAAAATGCATACAACAG	CGGTACCCGGGATCCCTAAATATTGAAACTATTAATTTCTGCAGTTTTGGTTG	23-288	39.3939
RS97	PF3D7_0713000	rifin	A-type		1	Yes	38903	346	GGCGGATATCTCGAGATGGAAATTAATATGAAGAGCCATAATAGATCTACACTTC	CGGTACCCGGGATCCCTAAGTATTTAAACCACTAGTAACAGGTGCTGCTTCT	24-303	78.7879
RS102	PF3D7_0732300	rifin	A-type		1	Yes	38417	338	GGCGGATATCTCGAGATGGTGCATTATCAAAGGAACCATAAAAGCCCTAT	CGGTACCCGGGATCCCTATGTCGAGTATGTAAAACCTGAAGCA	24-295	87.8788
RS105	PF3D7_0732500	rifin	A-type		1	Yes	41817	372	GGCGGATATCTCGAGATGACCCACAAAAAACTATCCACCACAACA	CGGTACCCGGGATCCCTAAGTCTGGTTACTCATATATATAGTATTTATTACACCTTC	26-329	89.3939
RS108	PF3D7_0732900	rifin	A-type		1	**	38928	339	GGCGGATATCTCGAGATGATATATAATCAAAGGAACCATAACAGCACCAC	CGGTACCCGGGATCCCTAAGTAGTTAATGTATTAGTAGCAGGTGTTAATGTATTTAT	19-296	40.9091
RS109	PF3D7_0800400	rifin	A-type		1	**	37422	330	GGCGGATATCTCGAGATGATATATAATCAAAGGAACCATAACAGCACCAC	CGGTACCCGGGATCCCTAAGTAGTTAAACTACTAGTTGCCTGTGCG	19-287	59.0909
RS110	PF3D7_0800500	rifin	A-type		1	Yes	41609	375	GGCGGATATCTCGAGATGAAAAATACATACATCAAATATAATACACTAAACACAAAA	CGGTACCCGGGATCCCTAAGTAATGGAACTGTTAAATCCAGCTTCTATCAAA	23-332	54.5455
RS111	PF3D7_0808800	rifin	A-type		1	Yes	43674	388	GGCGGATATCTCGAGATGCAAAAGAATCCTTACATCAATGCACTTCATA	CGGTACCCGGGATCCCTAAGTATGGTAAGTAAAACATGCAGCTTCTATAGTGTT	28-327	56.0606
RS117	PF3D7_0832500	rifin	A-type		1	Yes	36608	326	GGCGGATATCTCGAGATGAATCAACAAAATATATATAAAACATCAAACACATCAAA	CGGTACCCGGGATCCCTAAATATTGAAACTAGTAATTGCTGATGTTTCGGATGAC	26-283	54.5455
RS121	PF3D7_0833000	rifin	A-type		1	**	41163	368	GGCGGATATCTCGAGATGGAACATAATCCATGGAACCATTACATGAAACCACATAC	CGGTACCCGGGATCCCTAAGTCTTCCAAGCACCATATGTAGCTGCTAT	19-325	36.3636
RS122	PF3D7_0833100	rifin	A-type		1	Yes	41187	368	GGCGGATATCTCGAGATGCAAATTCCATCCATCACACCACACC	CGGTACCCGGGATCCCTAAGTATAGTAGGAAGTAGTTGCAGCTTCTACTTCGGCTAT	23-325	63.6364
RS124	PF3D7_0833400	rifin	A-type		1	Yes	38035	340	GGCGGATATCTCGAGATGAACCATAAAAACACCACACATCATACACC	CGGTACCCGGGATCCCTAAGTAGTTAAACTACTAGTAATCGATTTATACGTGGTAG	24-297	57.5758
RS125	PF3D7_0900200	rifin	A-type		1	**	42044	376	GGCGGATATCTCGAGATGATATATAATCAAAGGAACCATAACAGCACCAC	CGGTACCCGGGATCCCTAAGTATAGTAAGGAGTAGTTGTAGCTTCTATAGCCTTCTT	19-333	45.4545
RS127	PF3D7_0900400	rifin	A-type		1	**	38541	343	GGCGGATATCTCGAGATGGTAAATACCCACAAAAAACCACACACCA	CGGTACCCGGGATCCCTAAGTAGATAAACTACTAGTTGCATTGCCTGCTTTT	19-300	42.4242
RS129	PF3D7_0900600	rifin	A-type		1	**	40436	367	GGCGGATATCTCGAGATGATATATAATCAAAGGAACCATAACAGCACCAC	CGGTACCCGGGATCCCTAACCGTACAACTGTGTACTTGCAGCTTCTATA	19-324	53.0303
RS130	PF3D7_0900700	rifin	A-type		1	Yes	42137	381	GGCGGATATCTCGAGATGGTATATAATCAAAGGAACCATTACATCACACG	CGGTACCCGGGATCCCTAAGTCTGCTTACCCATGTATATAGTATTTATCGC	24-338	46.9697
RS135	PF3D7_0901100	rifin	A-type		1	**	38833	350	GGCGGATATCTCGAGATGGTGCATAATAAAAATAAACTATATATAACACCACAACAT	CGGTACCCGGGATCCCTAAGTATGGCAATTCATACAAGTAGTTTCTAT	20-326	27.2727
RS136	PF3D7_0901300	rifin	A-type		1	**	41811	378	GGCGGATATCTCGAGATGGTAAATACCCACAAAAAACCACACACCA	CGGTACCCGGGATCCCTAAGTAATGGAACTGTTAAATCCAGCTTCTAAC	19-335	33.3333
RS137	PF3D7_0901400	rifin	A-type		1	Yes	39811	350	GGCGGATATCTCGAGATGTATCATGAGTATAATCAAAGGAACCA	CGGTACCCGGGATCCCTAAGTAGTTATACTACTAGTAGAAGGTGCTAAGTCAGC	22-307	37.8788
RS138	PF3D7_0901500	rifin	A-type		1	Yes	40331	365	GGCGGATATCTCGAGATGAATACCCACAAAAAACTATCCACCACAAC	CGGTACCCGGGATCCCTAAGTGTTGTAACTGTTACATATAGATTCTACGGTAGCA	25-322	51.5152
RS143	PF3D7_0937500	rifin	A-type		1	**	41976	369	GGCGGATATCTCGAGATGGTAAATACCCACAAAAAACCATCCATCAC	CGGTACCCGGGATCCCTAAGTATAGTAGGAAGTAGTTGCAGCTTCTACTTCGGCTAT	19-326	43.9394
RS144	PF3D7_0937700	rifin	A-type		1	**	40648	367	GGCGGATATCTCGAGATGATATATAATCAAAGGAACCATAACAGCACAACAC	CGGTACCCGGGATCCCTAAGTTTGGTAACCCATATATGTAGTTTGTACCACA	19-324	34.8485
RS145	PF3D7_1000200	rifin	A-type		1	**	41405	371	GGCGGATATCTCGAGATGATATATAATCAAAGGAACTATTACATTACACCACG	CGGTACCCGGGATCCCTAAGTCTGGGAACTAGCATATGTAGCGTTTACT	19-328	30.303
RS147	PF3D7_1000400	rifin	A-type		1	**	41420	371	GGCGGATATCTCGAGATGGAACATAATAAAAATGAACCACACACCACAC	CGGTACCCGGGATCCCTAAGTATAGTAAGGAGTAGTTGTAGCTTCTACTGCCGCTAT	19-328	56.0606
RS148	PF3D7_1000500	rifin	A-type		1	Yes	40962	369	GGCGGATATCTCGAGATGAAAAATCCATCCATCACACAAAAAAGAC	CGGTACCCGGGATCCCTAAATCTGCCAACTAGTATATGTAGCATTTATCG	24-326	40.9091
RS151	PF3D7_1040000	rifin	A-type		1	Yes	40237	359	GGCGGATATCTCGAGATGCAAATGAACCATTACAATAGAGCCCATATGAAAAACA	CGGTACCCGGGATCCCTAATTAGAAAAAATAGCTGATGTACTTGTTACCTCG	28-317	42.4242
RS155	PF3D7_1040300	rifin	A-type		1	Yes	41996	378	GGCGGATATCTCGAGATGGTATACAATAAAAGGAATCATAAAAGCATTATACTTCAT	CGGTACCCGGGATCCCTAAGTCTGATTACTCATAAATATAGTATTTATCGCACCC	24-335	30.303
RS157	PF3D7_1040500	rifin	A-type		1	**	39541	350	GGCGGATATCTCGAGATGATAAATGACCAAAGGAACCATAAAAGCAC	CGGTACCCGGGATCCCTAAGTCTGGTAACCTCCATATGCAGTTTTT	19-307	37.8788
RS159	PF3D7_1040700	rifin	A-type		1	**	41717	372	GGCGGATATCTCGAGATGATAAATGACCAAAGGAACCATAAAAGCAC	CGGTACCCGGGATCCCTAAGTCTGATAACTAGCATATGTAGCGTCTA	19-329	43.9394
RS162	PF3D7_1041000	rifin	A-type		1	Yes	41244	370	GGCGGATATCTCGAGATGAATAAAAATAAATCATACACCACTATACATACACCAAT	CGGTACCCGGGATCCCTAAGTCTGGCAACTAGCATATGTAGCGTTTACT	21-327	63.6364
RS164	PF3D7_1041200	rifin	A-type		1	**	41322	371	GGCGGATATCTCGAGATGATATATAATCAAAGGAACCATAAAAGCACCACA	CGGTACCCGGGATCCCTAGGTGTACCAATTGTAACTTGCAATTTCTATA	19-328	30.303
RS165	PF3D7_1100300	rifin	A-type		1	**	37937	340	GGCGGATATCTCGAGATGGTAAATACCCACAAAAAACCATCCATCAC	CGGTACCCGGGATCCCTAAGTAGATAAACTACTAGTTGCATTGCCTGCTTTT	19-297	27.2727
RS166	PF3D7_1100400	rifin	A-type		1	Yes	36175	323	GGCGGATATCTCGAGATGAGGAATCATAACAACAGCACATATCATACATCAAA	CGGTACCCGGGATCCCTAATCAGTTAAGAATGCTGTTATTGTTGTAGAATCAG	23-280	34.8485
RS169	PF3D7_1101100	rifin	A-type		1	**	39429	349	GGCGGATATCTCGAGATGATATATAATCAAAGGAACCATAAAAGCACCACA	CGGTACCCGGGATCCCTAAGTCTGGTAACCTCCATATGCAGTTTTT	19-306	28.7879
RS175	PF3D7_1150000	rifin	A-type		1	Yes	40601	369	GGCGGATATCTCGAGATGCAAGGGAACCATAACCTTACACTATAT	CGGTACCCGGGATCCCTAAGTAATATAACTGTCAAATCCAGCTTCTACCACC	27-326	28.7879
RS176	PF3D7_1150200	rifin	A-type		1	Yes	38726	338	GGCGGATATCTCGAGATGTGGAACCATAAAAGCACCACAC	CGGTACCCGGGATCCCTAATTAGTTAATATACTAGTATATGGTGATAATTTAAGAC	23-295	34.8485
RS177	PF3D7_1150300	rifin	A-type		1	**	38462	341	GGCGGATATCTCGAGATGGTATATAATCAAAGGAACTATTACATTACACCACCTCAT	CGGTACCCGGGATCCCTAAGTAGATAAACTACTAGTTGCATTGCCTGCTTTT	19-298	28.7879
RS178	PF3D7_1200200	rifin	A-type		1	**	41978	378	GGCGGATATCTCGAGATGATATATAATCAAAGGAACCATAACAGCACCAC	CGGTACCCGGGATCCCTAAGTTTGGTAACCCATATATGTAGCGTTTACTTC	19-335	31.8182
RS180	PF3D7_1200500	rifin	A-type		1	**	40536	369	GGCGGATATCTCGAGATGGAACATAATAAAAATGAACCACACACCACAC	CGGTACCCGGGATCCCTAAGTAATGGAACTGTTAAATCCAGCTTCTATCAAA	19-326	51.5152
RS181	PF3D7_1253700	rifin	A-type		1	Yes	42311	375	GGCGGATATCTCGAGATGGATAAAAAAACTAACGATTATAGACCATATACTTTAACA	CGGTACCCGGGATCCCTAAGAGTTAGTAAAAAAGAAATTACTAATTGTTCCCAAAG	28-322	53.0303
RS185	PF3D7_1254200	rifin	A-type		1	**	39674	351	GGCGGATATCTCGAGATGATATATAATCAAAGGAACCATAAAAGCACCACA	CGGTACCCGGGATCCCTAATTAGATAAAATAGCACCAGTACTTGTTACCTTACTCA	19-308	43.9394
RS188	PF3D7_1254400	rifin	A-type		1	Yes	41801	379	GGCGGATATCTCGAGATGGTATATAATCAAAGGAACCATTTCATTACATATACACC	CGGTACCCGGGATCCCTAAGTCTGGGAACTAGCATATGTAGCGTTTACT	24-336	34.8485
RS192	PF3D7_1254700	rifin	A-type		1	**	36891	326	GGCGGATATCTCGAGATGGTAAATACCCACAAAAAACTATCCATCACACC	CGGTACCCGGGATCCCTAATGAGATAATATAGCATATGAAGTTGTTAGCTCAAG	19-283	34.8485
RS193	PF3D7_1254800	rifin	A-type		1	**	36197	317	GGCGGATATCTCGAGATGGTAAATACCCACAAAAAACCATCCATCAC	CGGTACCCGGGATCCCTAATTTGTAAAAAATGTTGTTGGCGTTGTT	19-274	45.4545
RS196	PF3D7_1255100	rifin	A-type		1	**	39690	350	GGCGGATATCTCGAGATGATATATAATCAAAGGAACCATAAAAGCACCACA	CGGTACCCGGGATCCCTAAGTGTGGTAAGCTGCATATGTAGTGTTT	19-307	51.5152
RS197	PF3D7_1300200	rifin	A-type		1	**	39465	348	GGCGGATATCTCGAGATGATATATAATCAAAGGAACCATAAAAGCACCACA	CGGTACCCGGGATCCCTAAGTCTGGTAACCTCCATATGCAGTGTTTA	19-305	63.6364
RS198	PF3D7_1300400	rifin	A-type		1	**	38428	343	GGCGGATATCTCGAGATGGTAAATACCCACAAAAAACCACACACCA	CGGTACCCGGGATCCCTAAGTAGATAAACTACTAGTTGCATTGCCTGCTTTT	19-300	71.2121
RS199	PF3D7_1300500	rifin	A-type		1	**	37486	331	GGCGGATATCTCGAGATGGTGCGTAATCAAAGGAACCATAGGAAAT	CGGTACCCGGGATCCCTAATCAGAAAAGATAGCACCAACACTTGTCAT	19-288	60.6061
RS201	PF3D7_1300700	rifin	A-type		1	Yes	41390	369	GGCGGATATCTCGAGATGAGGAACCATTACATCACACGTACACCAAAAG	CGGTACCCGGGATCCCTAGGTGTACCAGTTGTAACTTGTAGTTTCTATAGCCTTCTT	23-326	60.6061
RS205	PF3D7_1372700	rifin	A-type		1	Yes	38563	348	GGCGGATATCTCGAGATGAGGAACCATTACATCACACGTACACCAAAAG	CGGTACCCGGGATCCCTAAATGTGGTAACCACCATATGTAGCGTTTA	23-305	22.7273
RS208	PF3D7_1373000	rifin	A-type		1	**	38188	336	GGCGGATATCTCGAGATGGTATATAATCAAAGGAACTATTACATTACACCACG	CGGTACCCGGGATCCCTAAGTTGTTAAAGTAGTAGTTACATTGCCTGTATTAGTA	19-293	53.0303
RS209	PF3D7_1373100	rifin	A-type		1	**	38214	341	GGCGGATATCTCGAGATGGAGCATAATCAAAGGAACCATAAGAAAACTA	CGGTACCCGGGATCCCTAATTAGTTAATATAATAGTATTTGTTGCGAATTTGGCAGT	19-298	53.0303
RS211	PF3D7_1373400	rifin	A-type		1	**	41279	377	GGCGGATATCTCGAGATGATATATAATCAAAGGAACCATTACATCACACG	CGGTACCCGGGATCCCTAATTATGATAACCCATAAAAGTAGTTTCTATAGCGTTTT	19-334	40.9091
RS212	PF3D7_1400200	rifin	A-type		1	Yes	40830	364	GGCGGATATCTCGAGATGAGGAACTATTACATTACACCACGTCATACAAAAAC	CGGTACCCGGGATCCCTAGGTGTACCAATTGTAAGTTGCAGCATCTAT	23-321	53.0303
RS218	PF3D7_1400600	rifin	A-type		1	**	40920	367	GGCGGATATCTCGAGATGGTATATAATCAAAGGAACTATTACATTACACCACG	CGGTACCCGGGATCCCTAAGTATAGTAAGGAGTAGTTGCAGCTTCTATAGCTTCTG	19-325	36.3636
RS230	PF3D7_1479700	rifin	A-type		1	**	38864	348	GGCGGATATCTCGAGATGGAACATAATAAAAATGAACCACACACCACAC	CGGTACCCGGGATCCCTAAATGTGGTAACCACCATATGTAGCTTCTACC	19-305	72.7273
RS234	PF3D7_1480000	rifin	A-type		1	**	38442	340	GGCGGATATCTCGAGATGGAACATAATCCATGGAACCATTACATGAAACCACATAC	CGGTACCCGGGATCCCTAAGTAGTTAAATTACTAGTTACATTGCCTGCTTGTGT	19-297	42.4242
RS141	PF3D7_0937300	rifin	A-type		2	**	40999	371	GGCGGATATCTCGAGATGGTGCATAATAAAAATAAATCATACATCA	CGGTACCCGGGATCCCTAAGTCTGGAAACCACCATATGTAGTGTCTA	20-308	39.3939
RS3	PF3D7_0100600	rifin	B-type	B2	1	Yes	40530	359	GGCGGATATCTCGAGATGAATAAAAATAAACCATCCATCACACCACATC	CGGTACCCGGGATCCCTAGGTGTACCAATTGTAAATTGTAGCTTCCATAA	26-316	83.3333
RS9	PF3D7_0101900	rifin	B-type	B1	1	Yes	38190	343	GGCGGATATCTCGAGATGAATAAAAATAAACCATCCATCACACCTCATC	CGGTACCCGGGATCCCTAAGTCTGACAAATAGCATATTTAGCGTCTACTACAC	26-300	92.4242
RS10	PF3D7_0114700	rifin	B-type		1	Yes	35803	323	GGCGGATATCTCGAGATGTCATATGTGCATAATAAAAATAAACCATACATCAC	CGGTACCCGGGATCCCTAACGGTACGAACTATAACTTGTCTCTGAT	23-292	78.7879
RS12	PF3D7_0115300	rifin	B-type	B1	1	Yes	36971	336	GGCGGATATCTCGAGATGAACAAACCATCCATCACACCACATCATA	CGGTACCCGGGATCCCTAAGTCTGGCAACCAGCATATGTAGATTCTG	23-293	45.4545
RS29	PF3D7_0222500	rifin	B-type		1	Yes	35255	316	GGCGGATATCTCGAGATGAATAAACAATACATTACACCATATACACCAAATACTTC	CGGTACCCGGGATCCCTAACTGTACAAATGTGCACTTTCTTCATTTACCAAG	28-273	53.0303
RS31	PF3D7_0222700	rifin	B-type	B1	1	Yes	38318	348	GGCGGATATCTCGAGATGAATAAAAATAAACCATACATCACATCACGTCATAGA	CGGTACCCGGGATCCCTAATTCTGGCAAATAGCATATTTAGAGTCTACTGC	26-305	54.5455
RS36	PF3D7_0223200	rifin	B-type	B1	1	Yes	38113	345	GGCGGATATCTCGAGATGAATAAACCATACATCACACCACGTCATACAC	CGGTACCCGGGATCCCTAAGTCTGGCAACCAGCATATGTAGATTCTG	28-302	34.8485
RS41	PF3D7_0300500	rifin	B-type	B2	1	Yes	39975	359	GGCGGATATCTCGAGATGAATAAAAATAAACCATCCATCACACCACATC	CGGTACCCGGGATCCCTAACTGTACAACTGTGTACTTGCAGTTTCTATAGTTTTC	26-316	59.0909
RS57	PF3D7_0401000	rifin	B-type		1	Yes	34910	309	GGCGGATATCTCGAGATGTATCATGAACATAATAAAAATAAACCATACATCACATC	CGGTACCCGGGATCCCTAATCAGAACAAATAGTACCAACACTTGTCATCTCT	22-266	50
RS65	PF3D7_0421200	rifin	B-type	B1	1	Yes	38102	346	GGCGGATATCTCGAGATGAAAAACAAACCATCCATCACATCACATC	CGGTACCCGGGATCCCTAATTCTGGCAAATAACATATTTAGCGTCTACTACA	27-303	40.9091
RS70	PF3D7_0500500	rifin	B-type		1	Yes	34405	309	GGCGGATATCTCGAGATGGTAAATAATAAAAATAAACCATACATCACACCACATA	CGGTACCCGGGATCCCTAATTAGAACAAATAGTACCAACACTTGTCATTTCTG	24-266	45.4545
RS79	PF3D7_0631800	rifin	B-type		1	Yes	37737	342	GGCGGATATCTCGAGATGAATAAACTCTACATGAAACCACAC	CGGTACCCGGGATCCCTAAGTCTGGCAACTAGCATATGTAGCGTTTACT	23-300	28.7879
RS86	PF3D7_0632300	rifin	B-type	B2	1	Yes	40606	359	GGCGGATATCTCGAGATGAATAAAAATAAACCATCCATCACATCACATCATA	CGGTACCCGGGATCCCTAGGTGTACCAATTGTAAATTGTAGCTTCCATAA	26-316	28.7879
RS118	PF3D7_0832800	rifin	B-type		1	**	33897	306	GGCGGATATCTCGAGATGGAGTATAGTAAAAATAAACCATACATCACACCAAAT	CGGTACCCGGGATCCCTAACTATACGCAGTAGAACTTGTATTTGTTACCTTAAAAA	19-263	68.1818
RS123	PF3D7_0833200	rifin	B-type	B2	1	Yes	39743	356	GGCGGATATCTCGAGATGTATGTGCATAATAAAAATAAACCATCCATCAC	CGGTACCCGGGATCCCTAAGTTTGCTTACTCATAAATACAGTATTTATCAGACCG	23-313	40.9091
RS126	PF3D7_0900300	rifin	B-type	B2	1	Yes	40077	359	GGCGGATATCTCGAGATGAATAAACCACACACCACACCACATCATAC	CGGTACCCGGGATCCCTATGTCTGCTTACTCATAAATATAGTATTTATCGCCGTAGT	28-316	80.303
RS128	PF3D7_0900500	rifin	B-type	B1	1	Yes	37726	338	GGCGGATATCTCGAGATGAATAAAAATAAACCATACCTCAAAACACG	CGGTACCCGGGATCCCTAAGTCTGACAAATAGCATATTTAGCGTCTACTACAC	26-295	51.5152
RS142	PF3D7_0937400	rifin	B-type	B2	1	Yes	40607	359	GGCGGATATCTCGAGATGAATAATAATAATGAACCACAAACCACTCCACA	CGGTACCCGGGATCCCTAGGTGTACCAATTGTAAATTGTAGCTTCCATAA	27-316	83.3333
RS146	PF3D7_1000300	rifin	B-type	B1	1	Yes	38130	345	GGCGGATATCTCGAGATGGTGCATAATAATAATAAACTATACAACACA	CGGTACCCGGGATCCCTAATTCTGGCAAATAACATATTTAGCGTCTACTG	25-302	45.4545
RS152	PF3D7_1040100	rifin	B-type		1	Yes	34672	309	GGCGGATATCTCGAGATGAATAAAAATAAAATATACATCAAATCACATACACCAACT	CGGTACCCGGGATCCCTAACTGTACAAATGTGAACTTTCAGCATTTATCAAG	26-266	40.9091
RS156	PF3D7_1040400	rifin	B-type	B1	1	Yes	38184	348	GGCGGATATCTCGAGATGAATAAAAATAAATCATACATAGCACCGCATA	CGGTACCCGGGATCCCTAACTCTGGCAACTAGCATATGTAGATTCT	26-305	40.9091
RS158	PF3D7_1040600	rifin	B-type		1	Yes	36412	326	GGCGGATATCTCGAGATGAATAAACCACACACCACACCACATCATAC	CGGTACCCGGGATCCCTAATTATACAAATTAGTACTTGCAGTTTTTGCCAAAGT	28-283	75.7576
RS160	PF3D7_1040800	rifin	B-type		1	Yes	32777	295	GGCGGATATCTCGAGATGAATAAAAATAAATCATACATAGCACCGCATA	CGGTACCCGGGATCCCTAACTGTACAAATGTGTACTTGTAGTTGTTACATCAACA	21-265	51.5152
RS161	PF3D7_1040900	rifin	B-type		1	Yes	34791	311	GGCGGATATCTCGAGATGAATAAACCACACACCACACCACATCATAC	CGGTACCCGGGATCCCTAAGTAAAATAAGCACCACCTGTTGTTGTT	28-268	80.303
RS163	PF3D7_1041100	rifin	B-type	B1	1	Yes	37078	334	GGCGGATATCTCGAGATGAAACCATACATTACACAACATCATACACCAACTA	CGGTACCCGGGATCCCTAAGTCTGACAAATAGCATATGTAGATTCTACTACACCAAT	24-291	74.2424
RS170	PF3D7_1101200	rifin	B-type	B2	1	Yes	40002	356	GGCGGATATCTCGAGATGAATAAAAATAAACCATCCATCACATCACATCATA	CGGTACCCGGGATCCCTAAGTTTGCTTACTCATAAATACAGTATTTATCAGACCG	26-313	42.4242
RS173	PF3D7_1149800	rifin	B-type		1	Yes	35248	314	GGCGGATATCTCGAGATGGAAATTAATAAAAATAAACCATACATCTCACCACATAC	CGGTACCCGGGATCCCTAATAATATAGATTGACACTTGTAGCCTCTGCTGC	24-271	34.8485
RS179	PF3D7_1200300	rifin	B-type	B1	1	Yes	38098	345	GGCGGATATCTCGAGATGCATGTGTATAGTAAAAACAAACCATCCATCAC	CGGTACCCGGGATCCCTAACTCTGGCAACCAGCATATGTAGATTCTG	23-302	21.2121
RS182	PF3D7_1254000	rifin	B-type	B1	1	Yes	38096	346	GGCGGATATCTCGAGATGAATAAACCATACATCACACCACGTCATACAC	CGGTACCCGGGATCCCTAAGTCTGACAAGCAGCATATGCAGATTCTAC	24-303	46.9697
RS189	PF3D7_1254500	rifin	B-type		1	Yes	34513	306	GGCGGATATCTCGAGATGAATAAAAACAAACCATACATCACAACACATACAC	CGGTACCCGGGATCCCTAATTAGTTAATATAATAGTATCAGCTGCTAATTTGGTAC	21-269	66.6667
RS204	PF3D7_1372600	rifin	B-type		1	**	30639	272	GGCGGATATCTCGAGATGAAATGTGAGCTATATGTATCAAATTATGATAATGATCC	CGGTACCCGGGATCCCTAACTGTACATATTAGCACTGGGTGCTTCTAC	17-242	50
RS210	PF3D7_1373300	rifin	B-type	B2	1	Yes	39213	354	GGCGGATATCTCGAGATGAATAAACCGTACATGACACAACGCCTTAC	CGGTACCCGGGATCCCTAACCGTACAACTGTGTACTTGCAGCTTCTATA	28-311	60.6061
RS217	PF3D7_1400500	rifin	B-type		1	Yes	37661	339	GGCGGATATCTCGAGATGAGTAAAAATAAAACATACATTACATTACGTCATACACC	CGGTACCCGGGATCCCTAAGTGTGGAAATTAGAACATGTAATTTCGATC	27-296	22.7273
RS231	PF3D7_1479800	rifin	B-type	B1	1	Yes	37714	344	GGCGGATATCTCGAGATGAATAATAATAAAACATACGTCACATCACATA	CGGTACCCGGGATCCCTAAGTCTGACAAGCAGCATATGCAGATTCTAC	26-301	46.9697
RS200	PF3D7_1300600	rifin	B-type	B1	1	Yes	37824	345	GGCGGATATCTCGAGATGAATAAACCATACATCACATCACGTCATACAG	CGGTACCCGGGATCCCTAAGTCTGACAAGCAGCATATGCAGATTCTAC	29-302	78.7879
RS61	PF3D7_0401600	rifin	undefined type		1	Yes	40143	347	GGCGGATATCTCGAGATGAAGAATTTTCAAAGCAACGGTTACAT	CGGTACCCGGGATCCCTAACTTTGTTTTTTAAAACTACTACCATTAGATGTATCA	25-253	6.06061
RS62	PF3D7_0402600	stevor			1	Yes	33881	301	GGCGGATATCTCGAGATGAATAAGATTGGTAATATAAGTCTTATAAAAA	CGGTACCCGGGATCCCTAAGGTAAAAATGTTGAAGTAACAAGACCTGCATAAAGT	21-261	22.7273
RS66	PF3D7_0425500	stevor			1	Yes	34523	304	GGCGGATATCTCGAGATGAATAACCTTCGTAATAAAAGTCTCATAAACAAT	CGGTACCCGGGATCCCTATAAAAAAGTTGAACTAGCAAGACTTGCAGCACCTT	21-263	27.2727
RS114	PF3D7_0832000	stevor			1	Yes	34351	303	GGCGGATATCTCGAGATGAATACCCTTCCTAATAAAACCCTCATAAACAAT	CGGTACCCGGGATCCCTAAAAAGCTGAATTAGCAAAACTTGCAGCAAAGAAAC	21-261	54.5455
RS8	PF3D7_0101800	stevor			1	Yes	32700	289	GGCGGATATCTCGAGATGCCACATTATGATAATTATCAAAATAGCCATT	CGGTACCCGGGATCCCTATCTGTGTTTTAAATGTTTTAAATACTTATCTCTTCCTT	21-174	78.7879
RS28	PF3D7_0221400	stevor			1	Yes	35409	307	GGCGGATATCTCGAGATGCATAATAAAAAATATAATGTAGGCTATATTCAAAAT	CGGTACCCGGGATCCCTAAGCAAGCGCCTTCGTAAAT	27-229	40.9091
RS174	PF3D7_1149900	stevor			1	Yes	34833	308	GGCGGATATCTCGAGATGTATGAGAATTATCTAAATAACCATTATAATGTAGGTCT	CGGTACCCGGGATCCCTATTTTAAGTGTTTTAAATACTTATCTCTTCCTTTTGTTTT	23-176	24.2424
b. RIFINs and STEVORs expressed as two truncates
RS34	PF3D7_0223100	rifin	A-type		1	Yes	37480	330	GGCGGATATCTCGAGATGACACGTACACCAAAAGCAACCACTA	CGGTACCCGGGATCCCTAACATCTCAAGCATGTTTTTTCCACTTTATCT	28-141	51.5152
RS35	PF3D7_0223100	rifin	A-type		1	Yes	37480	330	GGCGGATATCTCGAGATGACAAATTATATTACTGAAATAGCTATACAAAAGGGT	CGGTACCCGGGATCCCTAAGTAGTTAAACTACTAGTTGCACTGGCTCCCT	165-287	22.7273
RS44	PF3D7_0324400	rifin	A-type		1	Yes	39481	349	GGCGGATATCTCGAGATGGTAAATAACCAAATGAACCATTACAATAGAGCC	CGGTACCCGGGATCCCTACGCTGTCATATTTTTACCACAGTTTAGAC	25-158	30.303
RS45	PF3D7_0324400	rifin	A-type		1	Yes	39481	349	GGCGGATATCTCGAGATGGTTGCAAAGGCTGCTATGGACG	CGGTACCCGGGATCCCTAAGTAGTTAAACTACTAGTAGTCGATGTATAGTTGGCTGC	182-306	74.2424
RS84	PF3D7_0632200	rifin	A-type		1	**	41826	377	GGCGGATATCTCGAGATGGTAAATACCCACCAAAAACCACAC	CGGTACCCGGGATCCCTAACATCTCAAACATCCTTTTTCCACTTTGT	19-144	19.697
RS85	PF3D7_0632200	rifin	A-type		1	**	41826	377	GGCGGATATCTCGAGATGAAACCTGGGGCACTTAAGGTTGCTATTA	CGGTACCCGGGATCCCTAAGTCTGGTTACTCATATATATAGTATTTATCACATCTG	168-334	12.1212
RS90	PF3D7_0700300	rifin	A-type		1	Yes	35468	316	GGCGGATATCTCGAGATGCCAAAGGAACACCCAATAAAAATACATAGAT	CGGTACCCGGGATCCCTAACAATTTAAACATGTTTTTTCAACTTTATCTGAT	22-135	48.4848
RS91	PF3D7_0700300	rifin	A-type		1	Yes	35468	316	GGCGGATATCTCGAGATGAATTCTATTGCTATTGACGTCGCGGTAAAG	CGGTACCCGGGATCCCTAGTTAGAAAAAAATGCAGGTGATGAAAATG	159-273	36.3636
RS100	PF3D7_0732200	rifin	A-type		1	Yes	41064	366	GGCGGATATCTCGAGATGCAAAGGAACTATTACATTACACCACG	CGGTACCCGGGATCCCTATCTCAAACAATCTTTTTCCATTTTGTCC	22-140	83.3333
RS101	PF3D7_0732200	rifin	A-type		1	Yes	41064	366	GGCGGATATCTCGAGATGAAACCTACGGCACTTAAGGCCGCTATTGT	CGGTACCCGGGATCCCTAAGTCTGGCAACTACCATATGTAGATTCTACTGC	164-323	92.4242
RS103	PF3D7_0732400	rifin	A-type		1	Yes	42377	382	GGCGGATATCTCGAGATGCAATGGAACCTTTATAATACAACTCAA	CGGTACCCGGGATCCCTAACATCTCAAACATGTTTTTTCCAATTTATCTG	27-152	83.3333
RS104	PF3D7_0732400	rifin	A-type		1	Yes	42377	382	GGCGGATATCTCGAGATGAACCAGTTGAAACCTACGGCGATTG	CGGTACCCGGGATCCCTAAATTTCGTAACCAGCATATGTAGCATTTATCA	176-339	89.3939
RS112	PF3D7_0808900	rifin	A-type		1	Yes	37837	332	GGCGGATATCTCGAGATGCATTACAACACTACGCTCCATACACCAAA	CGGTACCCGGGATCCCTAACACTTAAGGCAAAATTTTTCTGTTTTGTCGGCTACT	25-147	50
RS113	PF3D7_0808900	rifin	A-type		1	Yes	37837	332	GGCGGATATCTCGAGATGAATTATGCTGCTCTTCTTGCCCA	CGGTACCCGGGATCCCTAGTTATAAGAAAAATCAGCAGTTGTGGTT	171-290	66.6667
RS167	PF3D7_1100500	rifin	A-type		1	Yes	36843	327	GGCGGATATCTCGAGATGATTAAAAAAAAAATATACATTACACCACAAATACCAA	CGGTACCCGGGATCCCTAACAATTTAAACATGTTTTTTCAACTTTATCTGAT	26-146	31.8182
RS168	PF3D7_1100500	rifin	A-type		1	Yes	36843	327	GGCGGATATCTCGAGATGAATTCTATTGCTATTGACGTCGCGGTAAAAG	CGGTACCCGGGATCCCTAGTTAGAAAAAAATGCAGGTGATGAAAATG	170-284	33.3333
RS171	PF3D7_1101300	rifin	A-type		1	Yes	36816	330	GGCGGATATCTCGAGATGAATGTAGGTTCCCCCCACAAAAATCC	CGGTACCCGGGATCCCTAATTTTTTCCACATTTCAAACAACTTTTTTCTACT	23-150	10.6061
RS172	PF3D7_1101300	rifin	A-type		1	Yes	36816	330	GGCGGATATCTCGAGATGGCTACGAAAGCTGGAATGAAAG	CGGTACCCGGGATCCCTAACTCGAAAAAAATGTTTCCCATGTAAATG	174-287	42.4242
RS215	PF3D7_1400400	rifin	A-type		1	Yes	37603	337	GGCGGATATCTCGAGATGAAAAAACCATCCATCACACCACATCA	CGGTACCCGGGATCCCTAACATCGCAAACATCCTTTTTCCATTT	23-144	24.2424
RS216	PF3D7_1400400	rifin	A-type		1	Yes	37603	337	GGCGGATATCTCGAGATGAAAATGGGCGCTCCTACTGTGG	CGGTACCCGGGATCCCTAAGTAGTACATGTAGTTGCTGTACTTTCTATAGTATCCAA	168-294	50
RS23	PF3D7_0201000	rifin	B-type		1	Yes	35101	312	GGCGGATATCTCGAGATGAATAATAAAAATAAACCATCCATCACAC	CGGTACCCGGGATCCCTATTTTTCTACTTTTTCTGCTAATGATTTGTCCA	21-113	27.2727
RS24	PF3D7_0201000	rifin	B-type		1	Yes	35101	312	GGCGGATATCTCGAGATGGTAAATGAATGGACAAAAGCTGCT	CGGTACCCGGGATCCCTAAATGTACGAATTGTAACTTGTATTATTTGCTAAGG	137-269	48.4848
RS46	PF3D7_0324500	rifin	B-type		1	Yes	35811	317	GGCGGATATCTCGAGATGAAAAACAAACCATCCATCACATCACATC	CGGTACCCGGGATCCCTAACATCTCAGACAACCTATTTCTACTTTTTC	27-122	36.3636
RS47	PF3D7_0324500	rifin	B-type		1	Yes	35811	317	GGCGGATATCTCGAGATGTCACAATATGTTTCTGCAAAGGTCCT	CGGTACCCGGGATCCCTAAGTAGTTAAAGCATTAGTAGCAGGTGCGATTT	146-274	30.303
RS71	PF3D7_0532900	rifin	B-type		1	Yes	35980	318	GGCGGATATCTCGAGATGGTAAATATCGAAATGAACCATCACAACACA	CGGTACCCGGGATCCCTACCTAAGACAACCCTTTTCCACTTTTTCTGATAATG	25-125	59.0909
RS72	PF3D7_0532900	rifin	B-type		1	Yes	35980	318	GGCGGATATCTCGAGATGAAAGTCGCTGCAACGGCTACG	CGGTACCCGGGATCCCTACATGTACGAATATGTACTTGTAGCTGTTACG	149-275	63.6364
RS106	PF3D7_0732700	rifin	B-type	B2	1	Yes	40173	359	GGCGGATATCTCGAGATGAAAAATAAACCATCCATCACATCACATCATA	CGGTACCCGGGATCCCTAACCTTTTTCTATTTTTTCTGCTAAGTTTTTCTCC	27-118	93.9394
RS107	PF3D7_0732700	rifin	B-type	B2	1	Yes	40173	359	GGCGGATATCTCGAGATGAATATCTGGAAACCTGCGGCACTTG	CGGTACCCGGGATCCCTAACCGTACAACTGTGTACTTGCAGCTTCTATA	142-316	31.8182
RS133	PF3D7_0901000	rifin	B-type		1	Yes	34804	309	GGCGGATATCTCGAGATGAATAAAAATAAACGATACATCACTCCACAAACAC	CGGTACCCGGGATCCCTAACATTTTTCCACTTTTTCTTCTAATGACTTTTC	26-117	25.7576
RS134	PF3D7_0901000	rifin	B-type		1	Yes	34804	309	GGCGGATATCTCGAGATGGTAAATGAGATGAAAAAAGTTGCTGCG	CGGTACCCGGGATCCCTAATTAGAACAAATAGTACCAACACTTGTCATCTCTG	141-266	40.9091
RS149	PF3D7_1000600	rifin	B-type		1	Yes	40345	361	GGCGGATATCTCGAGATGAAAAATAAAATATACATCACACCACATCATACAACAAC	CGGTACCCGGGATCCCTACTTAAGACAACCTGTTTCTACTTTTTCTGCTAATG	27-121	34.8485
RS150	PF3D7_1000600	rifin	B-type		1	Yes	40345	361	GGCGGATATCTCGAGATGAAAACCGCCGCTTTAGCAGC	CGGTACCCGGGATCCCTAAATCTGGCAACTAGCATATGTAGATTCTATTGTT	145-296	62.1212
RS194	PF3D7_1255000	rifin	B-type	B1	1	Yes	37838	345	GGCGGATATCTCGAGATGAATAAATCATACATCACACAACGTCATACGC	CGGTACCCGGGATCCCTAACATTTTTCTACTTTTTCTGCTAATGATTTGTCC	29-119	50
RS195	PF3D7_1255000	rifin	B-type	B1	1	Yes	37838	345	GGCGGATATCTCGAGATGAATGAGTTGAAAAAAGCTGCTATGGTTGT	CGGTACCCGGGATCCCTAAATCTGGCAACTAGCATATGTAGATTCTACTGC	143-302	57.5758
RS213	PF3D7_1400300	rifin	B-type	B1	1	Yes	37685	342	GGCGGATATCTCGAGATGAAAAATAAAATATACATCAAATCACATACACCAACTACT	CGGTACCCGGGATCCCTAACATTTTTCTACTTTTTCTGCTAATGATTTGTCC	27-117	43.9394
RS214	PF3D7_1400300	rifin	B-type	B1	1	Yes	37685	342	GGCGGATATCTCGAGATGAGTGAGTTGAAAAAAGCTGCTATGGC	CGGTACCCGGGATCCCTAATTCTGGCAAATAACATATTTAGCGTCTACTG	141-299	56.0606
RS221	PF3D7_1400800	rifin	B-type		1	Yes	35360	316	GGCGGATATCTCGAGATGAAAAATAAACCATACATCATACCACG	CGGTACCCGGGATCCCTAACCTTTTTCCACTTTTTCTTCTAATGATTTTTCTAT	27-118	24.2424
RS222	PF3D7_1400800	rifin	B-type		1	Yes	35360	316	GGCGGATATCTCGAGATGAATGAGTGGACCAAAGTTGCAACAGC	CGGTACCCGGGATCCCTAACTGTACAAAAGTGAACTTTTAGCATTCACCAAGACTAT	142-273	59.0909
RS224	PF3D7_1479400	rifin	B-type	B2	1	Yes	40316	359	GGCGGATATCTCGAGATGAATAAAAATAAAGCATCCATCACACCACATC	CGGTACCCGGGATCCCTACCTAAGACAACCTTTTTCTATTTTT	26-121	40.9091
RS225	PF3D7_1479400	rifin	B-type	B2	1	Yes	40316	359	GGCGGATATCTCGAGATGAAACCTGCGGCACTTAAGGCCGCTATTG	CGGTACCCGGGATCCCTAGGTGTACCAATTGTAAATTGTAGCTTCCATAA	145-316	40.9091
RS228	PF3D7_1479600	rifin	B-type		1	Yes	38965	350	GGCGGATATCTCGAGATGCAAAGGAACCATTACATAACACTTCATATGCCAAACA	CGGTACCCGGGATCCCTAACATTTTTCTACTTTTTCTGCTAATGATTTGTCC	27-121	19.697
RS229	PF3D7_1479600	rifin	B-type		1	Yes	38965	350	GGCGGATATCTCGAGATGAAAGAGTTGACAAAAGCTGCTATTACTACGG	CGGTACCCGGGATCCCTAAGTCTGACAAGCAGCATATGCAGATTCTAC	145-307	18.1818
RS13	PF3D7_0115400	stevor			1	Yes	34281	301	GGCGGATATCTCGAGATGTATGAGAATTATCTAAATAACCATTATAATGTAAGTCT	CGGTACCCGGGATCCCTATCTGTGTTTTAGATGTTTTAAATACTTATCTTTCCCT	23-178	31.8182
RS14	PF3D7_0115400	stevor			1	Yes	34281	301	GGCGGATATCTCGAGATGAAAAAGGCTGCCTTTGATACCTTGAATGTTA	CGGTACCCGGGATCCCTATGGATATAATGCGCCCATAGCAGC	202-261	48.4848
RS235	PF3D7_0200400	stevor			1	Yes	34424	304	GGCGGATATCTCGAGATGGAAAATTTTGTAAATAACCATTATAATGTAAGTCTCAT	CGGTACCCGGGATCCCTAACGGGTACATCTCCCTTTCAAATGTTT	24-181	27.2727
RS236	PF3D7_0200400	stevor			1	Yes	34424	304	GGCGGATATCTCGAGATGAAAAAAGCTGCCCTAAGTGCTGTTG	CGGTACCCGGGATCCCTAAGGGTAAAATGCGGCCATAGCAG	202-264	33.3333
RS26	PF3D7_0201300	stevor			1	Yes	34226	305	GGCGGATATCTCGAGATGTATGAAAATCATAAAAATAACCATTATAATGTAAGCC	CGGTACCCGGGATCCCTATCTGTGTTTTAAGTGTTTTAAATACTTATCTTTTCCTT	23-178	31.8182
RS27	PF3D7_0201300	stevor			1	Yes	34226	305	GGCGGATATCTCGAGATGAAATCTGCTGCCCTTACTGCCTT	CGGTACCCGGGATCCCTAAGGGGGAAATGCGGCGCTAG	202-265	59.0909
RS32	PF3D7_0222800	stevor			1	Yes	34000	304	GGCGGATATCTCGAGATGTATGAGAATTATCTAAATAACCATTATAATGTATGTCT	CGGTACCCGGGATCCCTATCTCCCTTTTAAGTGTTTTAAATATTTATCTTTTCC	23-174	39.3939
RS33	PF3D7_0222800	stevor			1	Yes	34000	304	GGCGGATATCTCGAGATGAAAAATGCTGCCGTTGCTGCTG	CGGTACCCGGGATCCCTAAGGTTCAAATACACCCATAGCAGCACTT	198-264	33.3333
RS39	PF3D7_0300400	stevor			1	Yes	33360	296	GGCGGATATCTCGAGATGTATGAGAATTATCTAAATAATGATTATAATGTAAGTTTC	CGGTACCCGGGATCCCTAACGGGTACATCTCCCTTTTAAGTGTTTTA	23-177	24.2424
RS40	PF3D7_0300400	stevor			1	Yes	33360	296	GGCGGATATCTCGAGATGAAAGGTGCTGCTATTTCTACCG	CGGTACCCGGGATCCCTAAGGCAGAAAAATTGCACTAGCAGAAGTT	198-256	34.8485
RS48	PF3D7_0324600	stevor			1	Yes	33757	301	GGCGGATATCTCGAGATGCCACATTATGATAATTATCAAAATAGCCATT	CGGTACCCGGGATCCCTATCTGTGTTTTAGGTGTTTTAAATACTTATCTCTTCC	21-174	7.57576
RS49	PF3D7_0324600	stevor			1	Yes	33757	301	GGCGGATATCTCGAGATGAAAGTTGCTGCTGTTGCTGCC	CGGTACCCGGGATCCCTAAGGTTGAAATGTTCCCATAGCAGCAC	198-261	28.7879
RS54	PF3D7_0400800	stevor			1	Yes	32833	289	GGCGGATATCTCGAGATGTATGAAAATTATCTATATAACCCTTATAATGTGAGCC	CGGTACCCGGGATCCCTATCTGTGTTTTAGGTGTTTTAAATACTTATCTCTTCC	23-174	45.4545
RS55	PF3D7_0400800	stevor			1	Yes	32833	289	GGCGGATATCTCGAGATGAAAGCTACAATCATTAAATTTCTTACTGTCCCA	CGGTACCCGGGATCCCTAGGGCTGTAATGCAACTATAGAATATGTTGG	198-249	45.4545
RS76	PF3D7_0617600	stevor			1	Yes	33958	302	GGCGGATATCTCGAGATGAATGAAAATTGTCAAAATAACCAATATAATATAAGCCTC	CGGTACCCGGGATCCCTACTCTTTTAAGCGTTTTAAATACTTATCCTTGCT	23-177	16.6667
RS77	PF3D7_0617600	stevor			1	Yes	33958	302	GGCGGATATCTCGAGATGGCAAAAAAGGCCGCCGTTG	CGGTACCCGGGATCCCTAAGGGATTATAGCTGTTGTAGCAGCACTC	201-262	30.303
RS80	PF3D7_0631900	stevor			1	Yes	34108	303	GGCGGATATCTCGAGATGTATGAAAATTATCAAAATAACCATTATAACATAAGGC	CGGTACCCGGGATCCCTATCTATGTTTTAAGTGTTTTAAATACTTATCTCTTCCTTT	23-174	24.2424
RS81	PF3D7_0631900	stevor			1	Yes	34108	303	GGCGGATATCTCGAGATGAAAAAAGCTGCCGTTGATGCCA	CGGTACCCGGGATCCCTAAGGGGGAAATGCACCTATAGCAGCAC	198-263	19.697
RS92	PF3D7_0700400	stevor			1	Yes	33995	300	GGCGGATATCTCGAGATGGAGAATTATCTAAATAACCGTTATAATGTAAGTCT	CGGTACCCGGGATCCCTATCTGTGTTTTAGGTGTTTTAAATACTTATCTCTTCC	24-174	18.1818
RS93	PF3D7_0700400	stevor			1	Yes	33995	300	GGCGGATATCTCGAGATGAAAGCTGCTATCCTTGGTTCATTTCCAGAT	CGGTACCCGGGATCCCTAGGGGTAAAATATTCCCGTAGCAGCAG	198-260	50
RS98	PF3D7_0732000	stevor			1	Yes	33287	296	GGCGGATATCTCGAGATGGAGAATTATCTAAATAACCATTATAATGTAGGTCTCATT	CGGTACCCGGGATCCCTATCTGTGTTTTAGGTGTTTTAAATACTTATCTCTTCC	24-174	69.697
RS99	PF3D7_0732000	stevor			1	Yes	33287	296	GGCGGATATCTCGAGATGAAAGCTGCTATCATTGCTAAGTTTGC	CGGTACCCGGGATCCCTAAGGAACAAAAATTGCACTAACAGTAGTTGC	198-256	83.3333
RS115	PF3D7_0832400	stevor			1	Yes	34436	304	GGCGGATATCTCGAGATGTATGAAAATTATCTAAATAACCATTATAATATAAGCCTC	CGGTACCCGGGATCCCTAACGGGAACATCTCACTTTTAAGTGTTTTAA	23-179	57.5758
RS116	PF3D7_0832400	stevor			1	Yes	34436	304	GGCGGATATCTCGAGATGAAGAAGGCTGCCCTTGCGCACTTTAC	CGGTACCCGGGATCCCTAAGGACCAAACATTGCACTAGCAGAAG	200-264	62.1212
RS119	PF3D7_0832900	stevor			1	Yes	33862	304	GGCGGATATCTCGAGATGTATGAAAATTGTCAAAATAACCATTATAATATAAACCTA	CGGTACCCGGGATCCCTATCTGTGTTTTAGGTGTTTTAAATATTTATCTCTTCC	21-173	22.7273
RS120	PF3D7_0832900	stevor			1	Yes	33862	304	GGCGGATATCTCGAGATGAAAGCTGCTGCCGTTGGTCC	CGGTACCCGGGATCCCTAAGGTTCAAAAATTGCACTAGCAGAAGC	197-264	40.9091
RS131	PF3D7_0900900	stevor			1	Yes	33993	300	GGCGGATATCTCGAGATGCCACATTATGATAATTATCAAAATAGCCATT	CGGTACCCGGGATCCCTAACCACGGGTACATCTCCCTTTTA	21-181	27.2727
RS132	PF3D7_0900900	stevor			1	Yes	33993	300	GGCGGATATCTCGAGATGATTGCTAAGTTTGCAGAAGTGCCTAAGAA	CGGTACCCGGGATCCCTAGGGATAAAATATTCCCATAGCAGCACTTG	205-260	57.5758
RS139	PF3D7_0901600	stevor			1	Yes	34225	303	GGCGGATATCTCGAGATGAAAGGTCATTATAATGGAAGCCTCGTACTAAATA	CGGTACCCGGGATCCCTATCTGTGTTTTAGATGTTTTAAATACTTATCTTTTCCTTT	28-178	33.3333
RS140	PF3D7_0901600	stevor			1	Yes	34225	303	GGCGGATATCTCGAGATGAAAAAGGCTGCACTTGCTTACTT	CGGTACCCGGGATCCCTAAGGGAATATAGTTGTAGTAGCAGCAGTTGAAA	202-263	36.3636
RS153	PF3D7_1040200	stevor			1	Yes	34257	305	GGCGGATATCTCGAGATGAATAAGCATTATAACATAAGCCTCATACAAAACAAC	CGGTACCCGGGATCCCTAACCACGGGTACATCTCCCTTTTAAGTGTTT	28-182	31.8182
RS154	PF3D7_1040200	stevor			1	Yes	34257	305	GGCGGATATCTCGAGATGAAAGGTGCTCTTGCTGAGTATGC	CGGTACCCGGGATCCCTAAGGTTCAAATGCGGCCATAGCA	206-265	22.7273
RS183	PF3D7_1254100	stevor			1	Yes	33428	295	GGCGGATATCTCGAGATGGAGAATTATCTAAATAACCATTATAATGTAAGTCTT	CGGTACCCGGGATCCCTATCTGTGTTTTAGTTTTTTTAAATACTTATCTCTTCCTT	24-174	12.1212
RS184	PF3D7_1254100	stevor			1	Yes	33428	295	GGCGGATATCTCGAGATGAAAGCTGCTGCCCTTGCTGAGTT	CGGTACCCGGGATCCCTAAGGATCAAAAATTGCACCAGCAGAA	198-255	42.4242
RS186	PF3D7_1254300	stevor			1	Yes	34121	302	GGCGGATATCTCGAGATGTATGAGAATTATCTAAATAATTTTTATAATATAAGCGTC	CGGTACCCGGGATCCCTAACGGGTACATCTCCCTTTTAAGTGCTTTA	23-177	16.6667
RS187	PF3D7_1254300	stevor			1	Yes	34121	302	GGCGGATATCTCGAGATGAAAACGGCTGCCCTAAATTATATTGTG	CGGTACCCGGGATCCCTAAGGGTATATTGCGACCAAAGCATTC	198-262	43.9394
RS190	PF3D7_1254600	stevor			1	**	34048	302	GGCGGATATCTCGAGATGGAGAATTATCTAAATAAACATTATAATGTAAGTCT	CGGTACCCGGGATCCCTAACGGGTACATCTCCCTTTTAAGTGCTTTA	24-177	22.7273
RS191	PF3D7_1254600	stevor			1	**	34048	302	GGCGGATATCTCGAGATGAAAACGGCTGCCCTAAATTATATTGTG	CGGTACCCGGGATCCCTAAGGGTATATTGCGACCAAAGCATTC	198-262	48.4848
RS202	PF3D7_1300900	stevor			1	Yes	34654	308	GGCGGATATCTCGAGATGCCCCATAATGAAAATTATCTAAATAATCATTATAATATA	CGGTACCCGGGATCCCTACTCTTTTAAGTGTTTTAAATACTTATCTTTTCCTTTTGT	21-178	75.7576
RS203	PF3D7_1300900	stevor			1	Yes	34654	308	GGCGGATATCTCGAGATGGCAAAAAAGGCTGCCGTTGCT	CGGTACCCGGGATCCCTAGGGATAAAATATTCCCATAGCAGCACC	202-268	43.9394
RS206	PF3D7_1372800	stevor			1	Yes	34057	300	GGCGGATATCTCGAGATGTATGAGAATTATCTAAATAACCATTATAATGTAAGTCT	CGGTACCCGGGATCCCTAACGGGTACATCTCCCTTTTAAGTGTTTTA	21-178	37.8788
RS207	PF3D7_1372800	stevor			1	Yes	34057	300	GGCGGATATCTCGAGATGAAAGCTGCTGCCCTTGCTAAGTTTG	CGGTACCCGGGATCCCTAGGGGTATATTGCGCTCAAAGCAG	199-260	48.4848
RS219	PF3D7_1400700	stevor			1	Yes	33217	293	GGCGGATATCTCGAGATGTATGAAAATTGTCAAAATGACCATTATAATAAAAGCCTC	CGGTACCCGGGATCCCTATCTGTGTTTTAAGTGTTTTAAATACTTATCTTTTCCTT	23-178	31.8182
RS220	PF3D7_1400700	stevor			1	Yes	33217	293	GGCGGATATCTCGAGATGAAAGCTGCTGTCCTTAAATATATTGCTTC	CGGTACCCGGGATCCCTAAGGTTCAAAAATTGCAGTAGCAGCAC	202-253	39.3939
RS226	PF3D7_1479500	stevor			1	Yes	33737	299	GGCGGATATCTCGAGATGTATGAGAATTATCTAAATAATGATTATAATGTAAGTTTC	CGGTACCCGGGATCCCTATCTGTGTTTTAGGTGTTTTAAATACTTATCTCTTCC	23-174	34.8485
RS227	PF3D7_1479500	stevor			1	Yes	33737	299	GGCGGATATCTCGAGATGAAAGTTGCTGTCATTGGTTCATT	CGGTACCCGGGATCCCTAAGGAACGAAAATTGCATAAGCAGTACCTG	198-259	60.6061
RS232	PF3D7_1479900	stevor			1	Yes	34487	304	GGCGGATATCTCGAGATGGAGAATTATTTAAATAACCATTATAATATAAGTCTCATT	CGGTACCCGGGATCCCTATCTGTGTTTTAAGTTTTTTAAGTATTTATCTTTTCCTTT	24-178	27.2727
RS233	PF3D7_1479900	stevor			1	Yes	34487	304	GGCGGATATCTCGAGATGAAAGCTGCTGCCATGAAGGCTGTT	CGGTACCCGGGATCCCTAGGGGTAAAATGCAGCCATAGCAGGAGTTG	202-264	43.9394
c. SURFINS Expressed
RS237	PF3D7_1301800	SURFIN 13.1, pseudogene			1	No	256122	2164	GGCGGATATCTCGAGATGGCATCATATATAAAATTAAATATACCATTA	CGGTACCCGGGATCCCTATAAGGCATCATTATTTCCTTCAACCCA	2-657	56.0606
RS238	PF3D7_1301800	SURFIN 13.1, pseudogene			1	No	256122	2164	GGCGGATATCTCGAGATGCCCGTAAGAAAACGTGACGTAATAGAAA	CGGTACCCGGGATCCCTACTGGATCATCATATTAACCATCTTTG	658-1319	50
RS239	PF3D7_1301800	SURFIN 13.1, pseudogene			1	No	256122	2164	GGCGGATATCTCGAGATGATGAAAGACGAATGTACAGTAGCTAAAAA	CGGTACCCGGGATCCCTATGAGCTAATTTTTAACCAATCATTTTCGTT	1644-2164	57.5758
RS240	PF3D7_1301800	SURFIN 13.1, pseudogene			1	No	256122	2164	GGCGGATATCTCGAGATGGGAGCAAAAAAAAAGAAAAAGAAAAAAAAC	CGGTACCCGGGATCCCTATATTTTATTGTTTTTTAGGTTATCTTTTGA	1343-1626	86.3636
RS241	PF3D7_1477600	SURFIN 14.1			1	No	239529	1953	GGCGGATATCTCGAGATGATGCAAAAAAAAAAACAAATGATACCAGT	CGGTACCCGGGATCCCTAATTACAAAATGATTTGGTATATTCCACTA	371-904	74.2424
RS242	PF3D7_1477600	SURFIN 14.1			1	No	239529	1953	GGCGGATATCTCGAGATGACGTGGAAAGATAGACACAATTATATGTT	CGGTACCCGGGATCCCTACTCATCCACACAAGTATCCAAAAAT	905-1442	74.2424
RS243	PF3D7_1477600	SURFIN 14.1			1	No	239529	1953	GGCGGATATCTCGAGATGTTGAGAGAGCAAGAAATTTTGGAGG	CGGTACCCGGGATCCCTATAACGTAGATTTATTATCCTCATTTC	1443-1953	87.8788
RS244	PF3D7_0831100	SURFIN 8.1			1	No	236181	1921	GGCGGATATCTCGAGATGGTTATTGAATTAGATGGATGTATAAAT	CGGTACCCGGGATCCCTATGTATCATTTTGATTTCTAATATAACTTTCTCG	1369-1921	66.6667
RS245	PF3D7_0831100	SURFIN 8.1			1	No	236181	1921	GGCGGATATCTCGAGATGGAAGATAAAAAAAATAAGGAAAATTA	CGGTACCCGGGATCCCTATCCTTTTCTTTCAATTTCTTCTAA	867-1368	86.3636
RS246	PF3D7_0831100	SURFIN 8.1			1	No	236181	1921	GGCGGATATCTCGAGATGAATAGAACGAAACATTTGAATATGTTGATAAAGG	CGGTACCCGGGATCCCTAATTTTGTCCCTTTACCAATTCTTCTAT	363-866	75.7576
RS247	PF3D7_0830800	SURFIN 8.2			1	No	248479	2049	GGCGGATATCTCGAGATGATAAGTGGAACATATGAAATTCAAGAGGAAATA	CGGTACCCGGGATCCCTACAGTGTATATTTCTTCCTGTTAT	1304-2049	51.5152
RS248	PF3D7_0830800	SURFIN 8.2			1	No	248479	2049	GGCGGATATCTCGAGATGAAAGAAAGTACCTTTTTATGGTTTT	CGGTACCCGGGATCCCTAATAATCATAATCTTCTTTTTCGTA	569-1303	39.3939
RS249	PF3D7_0800700	SURFIN 8.3			1	No	235054	1925	GGCGGATATCTCGAGATGATATGTATCATATGGATAAAAATATATATGATGA	CGGTACCCGGGATCCCTATAATGTGGATTTATTGCCCTCATTTCTACTA	1389-1925	63.6364
RS250	PF3D7_0800700	SURFIN 8.3			1	No	235054	1925	GGCGGATATCTCGAGATGCAAAATGAAGATAAAAAAAATAAGGAAAAT	CGGTACCCGGGATCCCTATAATTTTTTCTTTCTATATTCTTTT	853-1388	74.2424
RS251	PF3D7_0800700	SURFIN 8.3			1	No	235054	1925	GGCGGATATCTCGAGATGATGAATAAAAAAAAACCAATGATACCTGTGA	CGGTACCCGGGATCCCTATCCCTTTACCAATTCTTCTATACATAT	351-852	56.0606
RS252	PF3D7_0424400	SURFIN 4.2			1	No	286412	2380	GGCGGATATCTCGAGATGGGATATCTAGAACCAGCCTTTTTGTG	CGGTACCCGGGATCCCTATGTTTTATTTTCAGTATTTTTCTTTTTATCACGA	1797-2380	60.6061
RS253	PF3D7_0424400	SURFIN 4.2			1	No	286412	2380	GGCGGATATCTCGAGATGAAGAATTTATTATTAGACAATTATAT	CGGTACCCGGGATCCCTAATTATTATCATCATTTATATTTTTATTTTT	1195-1796	60.6061
RS268	PF3D7_0424400	SURFIN 4.2			1	No	286412	2380	GGCGGATATCTCGAGATGGAATTACCTAATCAACAAGAGGTATTTGGACTAT	CGGTACCCGGGATCCCTACTTATTAAATACCAAAAACATAAAAAGAAATACA	765-1194	33.3333
RS254	PF3D7_0424400	SURFIN 4.2			1	No	286412	2380	GGCGGATATCTCGAGATGGAATTACCTAATCAACAAGAGGTATTTGGACTAT	CGGTACCCGGGATCCCTAAATATGTATACATTCATCCTTTTTATATTCTTCT	595-1194	48.4848
RS255	PF3D7_0424400	SURFIN 4.2			1	No	286412	2380	GGCGGATATCTCGAGATGCTTTTTGTTGTTGAGCTCGACAGCAG	CGGTACCCGGGATCCCTACATAGTTGTAGATAACATTCTATATTTAT	2-594	53.0303
RS256	PF3D7_0402200	SURFIN 4.1, pseudogene			0	No	265611	2219	GGCGGATATCTCGAGATGAATAATAATTTTAGAAAAAATATAAAATATGAGC	CGGTACCCGGGATCCCTATTTTTTTCTTTTATTATTATGTTTATCAA	1605-2219	65.1515
RS257	PF3D7_0402200	SURFIN 4.1, pseudogene			0	No	265611	2219	GGCGGATATCTCGAGATGAATGATTATATAGATCTAAAGAAAGATTAT	CGGTACCCGGGATCCCTAATCATAGTTATTCAAATTCATTGCTATTTT	1071-1604	31.8182
RS258	PF3D7_0402200	SURFIN 4.1, pseudogene			0	No	265611	2219	GGCGGATATCTCGAGATGCCTGGATCCATTTATGAAAATCCTTCA	CGGTACCCGGGATCCCTATTTATATTTTATTACCAATTTATTGATCCACTCA	537-1070	86.3636
RS259	PF3D7_0402200	SURFIN 4.1, pseudogene			0	No	265611	2219	GGCGGATATCTCGAGATGCATTTTGTAGTTGAATTGGATAATACAGGTGAT	CGGTACCCGGGATCCCTACATATATTTGTTAGTTATAGCTTCCATTTGTG	2-536	27.2727
RS260	PF3D7_0115000	SURFIN 1.3			1	No	234771	1925	GGCGGATATCTCGAGATGGAAAGAAAAGGAGCCATTGAAGAAGAT	CGGTACCCGGGATCCCTATAATGTGGATTTATTGCCCTCATTTCTACTAT	1354-1925	74.2424
RS261	PF3D7_0115000	SURFIN 1.3			1	No	234771	1925	GGCGGATATCTCGAGATGCAAAATGAAGATAAAAAAAATAAGGAAAAT	CGGTACCCGGGATCCCTAAATTTCTTCTAATAATTTATCAAACCAT	853-1353	54.5455
RS262	PF3D7_0115000	SURFIN 1.3			1	No	234771	1925	GGCGGATATCTCGAGATGATGAATAAAAAAAAACCAATGATACCTGTGAA	CGGTACCCGGGATCCCTATCCCTTTACCAATTCTTCTATACATAT	351-852	46.9697
RS263	PF3D7_0113600	SURFIN 1.2, pseudogene			0	No	223901	1893	GGCGGATATCTCGAGATGAAAGATAAAGAATATATAATAGATGTTGTT	CGGTACCCGGGATCCCTACATTTCTTCCGAATAAAATGTCAAGATTT	1271-1893	45.4545
RS269	PF3D7_0113600	SURFIN 1.2, pseudogene			0	No	223901	1893	GGCGGATATCTCGAGATGATGAATCCTTTTGGTACAACAATTGTTCAAG	CGGTACCCGGGATCCCTAAATATGTATACATTCATCCTTTTTATATTCTTCT	878-1270	51.5152
RS264	PF3D7_0113600	SURFIN 1.2, pseudogene			0	No	223901	1893	GGCGGATATCTCGAGATGACTTGTGGTGATGTAGGACGCGATG	CGGTACCCGGGATCCCTATATATGTTCGATCAATGTATCCACATATGTCTCT	636-1270	100
RS265	PF3D7_0113600	SURFIN 1.2, pseudogene			0	No	223901	1893	GGCGGATATCTCGAGATGCATTTCGTTGTAGAATTTCAAGATTGGATC	CGGTACCCGGGATCCCTAATCAGGTTTATCCCTTTTTTTTTCTTTAG	2-635	33.3333
RS266	PF3D7_0113100	SURFIN 1.1			1	No	192349	1555	GGCGGATATCTCGAGATGTTGTTATATATAGAAAATGAAATAAACAAATTAA	CGGTACCCGGGATCCCTATTTAAAATTTATATATTTCAAATATTTTTTCAA	936-1555	72.7273
RS267	PF3D7_0113100	SURFIN 1.1			1	No	192349	1555	GGCGGATATCTCGAGATGCGAAAGAAAAAAAAGGGCATTACC	CGGTACCCGGGATCCCTAGTCTATTATATTCCCTCTATCTAATTGTTCCAA	331-935	21.2121
** signal peptide is likely to be present

## Sheet: Table S2
Table S2: Immunoreactivity of RIFINs, STEVORs and SURFINS and their association with reduced risk of developing clinical malaria
						Unadjusted PPE a					Age and Bed-net use adjusted PPE					Unadjusted PPE for confirmed exposure					Age and Bed-net use adjusted PPE for confirmed exposure					Unadjusted Relative risks Modified poisson regression
Product ID	GeneID	Product Description	Expressed region	Seroprevalence (%)		PPE %	Lower 95% CI	Upper 95% CI	P value		PPE %	Lower 95% CI	Upper 95% CI	P value		PPE %	Lower 95% CI	Upper 95% CI	P value		PPE %	Lower 95% CI	Upper 95% CI	P value		RR %	Lower 95% CI	Upper 95% CI	P value
RS23	PF3D7_0201000	rifin	21-113	27.2727		80.5897	17.3884	95.4394	0.0265235		-178.72	-1404.28	48.3575	0.23338		81.7943	22.4489	95.7261	0.0212338		-165.955	-1321.37	50.2366	0.252684		0.242424	0.0633289	0.928005	0.0385404
RS189	PF3D7_1254500	rifin	21-269	66.6667		59.5931	5.50058	82.7225	0.0365745		-172.682	-1427.32	51.3161	0.253818		70.2241	27.9832	87.6889	0.00717845		-186.019	-1437.62	46.7963	0.220724		0.5	0.248745	1.00505	0.0516751
RS264	PF3D7_0113600	SURFIN 1.2, pseudogene	636-1270	100		59.3501	4.93705	82.6177	0.0378225		-257.836	-1913.01	36.3908	0.148004		62.4812	12.1828	83.9706	0.02386		-300.431	-2172.65	29.4455	0.117298		0.5	0.248745	1.00505	0.0516751
RS163	PF3D7_1041100	rifin	24-291	74.2424		58.5362	3.05616	82.2656	0.042195		-186.145	-1487.8	48.4324	0.229179		61.4283	9.75624	83.5138	0.0280438		-160.403	-1342.84	53.0026	0.273258		0.5	0.248745	1.00505	0.0516751
RS158	PF3D7_1040600	rifin	28-283	75.7576		58.5362	3.05616	82.2656	0.042195		-178.194	-1454.72	50.2215	0.24386		61.4283	9.75624	83.5138	0.0280438		-183.198	-1417.65	47.1544	0.224237		0.5	0.248745	1.00505	0.0516751
RS99	PF3D7_0732000	stevor	198-256	83.3333		58.1182	2.0543	82.0913	0.0446591		-209.511	-1581.4	43.0253	0.190719		60.9389	8.57016	83.3121	0.0302764		-190.537	-1463.94	46.0264	0.214272		0.5	0.248745	1.00505	0.0516751
RS89	PF3D7_0700200	rifin	23-280	27.2727		67.923	-7.64729	90.4416	0.0656697		-240.244	-1789.11	38.7192	0.161498		69.3807	-2.85242	90.8846	0.0555602		-212.204	-1600.59	42.6839	0.188041		0.380952	0.129156	1.12364	0.0803363
RS141	PF3D7_0937300	rifin	20-308	39.3939		56.2987	-10.207	82.6708	0.0794261		-188.115	-1456.74	46.6771	0.218917		61.1838	1.97327	84.6298	0.0452708		-174.834	-1369.33	48.5934	0.237203		0.512821	0.234858	1.11976	0.0937231
RS186	PF3D7_1254300	stevor	23-177	16.6667		81.5688	-36.5729	97.5126	0.0979358		-198.982	-1519.75	44.8124	0.203931		83.6118	-21.5278	97.79	0.0768546		-167.997	-1332.24	49.8529	0.248984		0.217391	0.0326918	1.44559	0.114399
RS233	PF3D7_1479900	stevor	202-264	43.9394		52.4507	-14.751	80.297	0.0981566		-211.756	-1593.56	42.6111	0.187893		55.1193	-8.41271	81.4203	0.0750017		-195.887	-1489.21	44.9102	0.205935		0.525355	0.252213	1.0943	0.0855668
RS106	PF3D7_0732700	rifin	27-118	93.9394		49.2459	-16.057	77.8042	0.108035		-267.769	-1943.71	33.8193	0.136687		52.4864	-8.73407	79.2379	0.0781153		-253.838	-1824.17	34.9323	0.143583		0.6	0.306748	1.1736	0.135616
RS45	PF3D7_0324400	rifin	182-306	74.2424		48.9272	-16.7667	77.6612	0.111257		-276.292	-2062.12	34.511	0.137417		62.4812	12.1828	83.9706	0.02386		-346.396	-2426.11	21.1159	0.0906948		0.6	0.306748	1.1736	0.135616
RS242	PF3D7_1477600	SURFIN 14.1	905-1442	74.2424		47.2581	-20.564	76.9276	0.12936		-196.909	-1559.65	46.8834	0.215195		59.157	4.43156	82.5449	0.0389733		-163.709	-1387.97	53.2633	0.272042		0.6	0.306748	1.1736	0.135616
RS37	PF3D7_0223400	rifin	19-284	10.6061		-125.153	-560.458	23.2446	0.139366		-333.928	-2427.63	25.5058	0.102582		-116.983	-537.583	26.1561	0.158953		-357.375	-2654.97	24.0673	0.0970255		1.68571	0.809232	3.51152	0.163123
RS92	PF3D7_0700400	stevor	24-174	18.1818		65.5133	-46.74	91.895	0.149609		-208.036	-1568.66	43.1365	0.191858		65.315	-47.6535	91.8522	0.151947		-190.674	-1457.7	45.7587	0.212849		0.409091	0.110889	1.50921	0.179597
RS253	PF3D7_0424400	SURFIN 4.2	1195-1796	60.6061		45.4208	-24.7808	76.1271	0.151224		-197.133	-1557.4	46.7309	0.214313		47.4854	-20.1281	77.043	0.127113		-180.191	-1472.71	50.0816	0.241766		0.6	0.306748	1.1736	0.135616
RS130	PF3D7_0900700	rifin	24-338	46.9697		46.2726	-25.6414	77.0249	0.151765		-188.922	-1500.6	47.8471	0.22449		45.1888	-28.2691	76.5784	0.165728		-168.647	-1384.41	51.3808	0.257174		0.564516	0.281013	1.13403	0.108152
RS256	PF3D7_0402200	SURFIN 4.1, pseudogene	1605-2219	65.1515		45.0317	-25.6455	75.9521	0.15598		-205.194	-1625.6	46.0227	0.206822		59.157	4.43156	82.5449	0.0389733		-163.709	-1387.97	53.2633	0.272042		0.6	0.306748	1.1736	0.135616
RS25	PF3D7_0201200	rifin	23-313	31.8182		49.4634	-35.4147	81.1398	0.174748		-221.867	-1672.45	41.5509	0.179272		48.511	-38.021	80.7919	0.187018		-191.602	-1483.81	46.3119	0.215136		0.56391	0.243942	1.30356	0.180278
RS13	PF3D7_0115400	stevor	23-178	31.8182		48.9246	-36.8508	80.9377	0.18152		-220.36	-1662.68	41.7758	0.180809		47.7563	-40.0311	80.5086	0.196825		-189.702	-1472.02	46.6121	0.217698		0.56391	0.243942	1.30356	0.180278
RS95	PF3D7_0701100	rifin	19-286	31.8182		48.7373	-37.3517	80.8676	0.183907		-229.032	-1711.27	40.2286	0.171131		53.1105	-25.7123	82.5106	0.132273		-207.94	-1570.7	43.2413	0.192385		0.56391	0.243942	1.30356	0.180278
RS121	PF3D7_0833000	rifin	19-325	36.3636		46.3866	-35.1153	78.7263	0.186233		-196.86	-1529.4	45.9149	0.210391		48.6832	-29.389	79.6473	0.157387		-182.736	-1444.38	48.2383	0.230222		0.583333	0.268483	1.26741	0.173385
RS179	PF3D7_1200300	rifin	23-302	21.2121		55.7126	-48.6306	86.8037	0.187353		-177.743	-1394.67	48.389	0.234179		58.5043	-39.4063	87.6484	0.154844		-163.221	-1301.24	50.554	0.256613		0.530612	0.184569	1.52544	0.239514
RS153	PF3D7_1040200	stevor	28-182	31.8182		47.86	-39.7562	80.5477	0.195469		-194.256	-1495.99	45.7474	0.2109		57.1726	-14.9531	84.0441	0.0923104		-175.688	-1377.04	48.5429	0.236359		0.56391	0.243942	1.30356	0.180278
RS165	PF3D7_1100300	rifin	19-297	27.2727		49.97	-46.4404	82.9077	0.206285		-200.988	-1529.96	44.4196	0.201075		55.9444	-29.0478	84.9599	0.13494		-184.411	-1430.33	47.1423	0.223454		0.533333	0.211099	1.34744	0.183738
RS9	PF3D7_0101900	rifin	26-300	92.4242		40.5803	-33.8442	73.6209	0.208976		-209.653	-1579.81	42.9192	0.190172		44.554	-24.9603	75.3982	0.154879		-187.032	-1449.95	46.8453	0.220395		0.714286	0.371969	1.37163	0.312146
RS232	PF3D7_1479900	stevor	24-178	27.2727		49.2301	-48.6335	82.6581	0.216145		-215.32	-1618.98	42.1596	0.184431		55.1225	-31.4992	84.6844	0.144087		-201.683	-1529.26	44.1385	0.199404		0.533333	0.211099	1.34744	0.183738
RS238	PF3D7_1301800	SURFIN 13.1, pseudogene	658-1319	50		-66.4111	-274.915	26.1362	0.219094		-259.913	-1870.19	34.2513	0.139805		-39.7073	-212.052	37.4523	0.414772		-234.661	-1710.53	38.1406	0.160808		1.4	0.729059	2.6884	0.312146
RS183	PF3D7_1254100	stevor	24-174	12.1212		71.4197	-111.788	96.1432	0.22034		-206.47	-1562.31	43.498	0.194217		70.7034	-117.24	96.0491	0.22975		-212.29	-1619.13	43.2704	0.190682		0.315217	0.0490382	2.02622	0.223944
RS3	PF3D7_0100600	rifin	26-316	83.3333		39.5987	-36.04	73.182	0.223602		-242.015	-1797.67	38.3591	0.159566		52.6365	-8.32323	79.2906	0.076636		-236.394	-1767.85	39.4162	0.165444		0.714286	0.371969	1.37163	0.312146
RS126	PF3D7_0900300	rifin	28-316	80.303		39.4571	-36.3722	73.1218	0.225815		-248.506	-1980.12	41.611	0.170784		43.0035	-28.439	74.7071	0.17504		-258.396	-2092.61	41.4179	0.167185		0.714286	0.371969	1.37163	0.312146
RS131	PF3D7_0900900	stevor	21-181	27.2727		48.4288	-50.9893	82.3856	0.226971		-217.534	-1633.75	41.8439	0.182172		40.8508	-73.2658	79.8077	0.338266		-194.518	-1481.98	45.1695	0.207902		0.533333	0.211099	1.34744	0.183738
RS101	PF3D7_0732200	rifin	164-323	92.4242		39.2712	-36.7838	73.0378	0.228633		-337.262	-2802.19	34.1192	0.126561		52.2261	-9.26564	79.112	0.0801125		-415.24	-3302.66	21.9809	0.0887098		0.714286	0.371969	1.37163	0.312146
RS245	PF3D7_0831100	SURFIN 8.1	867-1368	86.3636		39.2322	-36.8808	73.0224	0.229271		-236.601	-1838.22	41.5443	0.17419		52.5304	-8.60063	79.2509	0.0776371		-252.919	-1955.18	39.3961	0.160662		0.714286	0.371969	1.37163	0.312146
RS53	PF3D7_0400700	rifin	19-337	37.8788		-62.9861	-263.956	27.0118	0.23335		-217.785	-1611.54	40.996	0.178347		-20.7265	-169.561	45.9311	0.645811		-203.085	-1522.49	43.3827	0.195182		1.38769	0.738799	2.60651	0.30834
RS161	PF3D7_1040900	rifin	28-268	80.303		38.9455	-37.5231	72.8944	0.233687		-247.321	-1837.29	37.7317	0.155672		53.6189	-6.10758	79.7262	0.068826		-271.713	-1966.27	33.1304	0.133573		0.714286	0.371969	1.37163	0.312146
RS142	PF3D7_0937400	rifin	27-316	83.3333		38.9455	-37.5231	72.8944	0.233687		-235.565	-1874.39	42.9679	0.180599		51.899	-10.0253	78.9711	0.0829804		-246.088	-1916.63	40.6055	0.167394		0.714286	0.371969	1.37163	0.312146
RS171	PF3D7_1101300	rifin	23-150	10.6061		70.3464	-119.704	95.9976	0.234185		-215.622	-1614.04	41.8818	0.183074		69.0921	-129.101	95.8302	0.25062		-191.724	-1462.56	45.5363	0.211176		0.36646	0.0580583	2.31307	0.285566
RS149	PF3D7_1000600	rifin	27-121	34.8485		42.7476	-44.2821	77.2817	0.23697		-210.422	-1585.16	42.8174	0.189384		43.9005	-41.4254	77.7469	0.220472		-190.115	-1455.52	45.8919	0.213822		0.623188	0.287722	1.34979	0.230413
RS73	PF3D7_0600300	rifin	19-328	25.7576		47.5981	-53.3482	82.0933	0.238172		-206.288	-1558.9	43.4492	0.194069		53.0882	-37.3308	83.9751	0.16724		-190.977	-1461.89	45.7913	0.212851		0.576471	0.229526	1.44785	0.241064
RS249	PF3D7_0800700	SURFIN 8.3	1389-1925	63.6364		38.1643	-39.2829	72.5475	0.245957		-203.665	-1570.54	44.8009	0.201648		41.4505	-31.9459	74.0193	0.196618		-208.46	-1598.77	43.9904	0.195647		0.714286	0.371969	1.37163	0.312146
RS191	PF3D7_1254600	stevor	198-262	48.4848		38.5453	-40.4826	73.1164	0.248431		-202.827	-1545.64	44.2745	0.199521		57.1569	-0.305139	81.7005	0.0508262		-189.29	-1457.11	46.2538	0.216104		0.6375	0.325972	1.24675	0.188334
RS155	PF3D7_1040300	rifin	24-335	30.303		43.9175	-50.2695	79.0693	0.250106		-209.903	-1581.86	42.8967	0.189963		47.1685	-41.636	80.2934	0.204748		-192.785	-1469.42	45.3789	0.209834		0.605263	0.262976	1.39307	0.237794
RS51	PF3D7_0400300	rifin	19-327	43.9394		39.1914	-42.1354	73.9848	0.250845		-199.211	-1525.1	44.9095	0.20429		41.362	-37.1216	74.9244	0.218108		-195.128	-1489.42	45.2	0.207742		0.637931	0.318155	1.27911	0.205355
RS119	PF3D7_0832900	stevor	21-173	22.7273		-66.9444	-302.866	30.8196	0.254198		-211.897	-1588.97	42.4027	0.186889		-74.2132	-320.729	27.8627	0.217217		-240.699	-1771.82	37.9879	0.158469		1.4	0.719386	2.72454	0.321952
RS164	PF3D7_1041200	rifin	19-328	30.303		43.074	-52.5007	78.7504	0.262449		-207.062	-1572.95	43.6402	0.194622		45.9963	-44.7235	79.8484	0.220577		-192.547	-1470.13	45.4926	0.210524		0.605263	0.262976	1.39307	0.237794
RS251	PF3D7_0800700	SURFIN 8.3	351-852	56.0606		-59.0423	-258.167	29.3781	0.262622		-364.181	-2645.92	21.5331	0.0905329		-30.1581	-190.612	41.7054	0.520124		-366.49	-2615.03	19.8489	0.0865739		1.4	0.729059	2.6884	0.312146
RS113	PF3D7_0808900	rifin	171-290	66.6667		37.1163	-41.6353	72.0807	0.262825		-214.294	-1615.76	42.4275	0.186039		23.2752	-71.3325	65.6417	0.518039		-212.814	-1610.51	42.7932	0.188289		0.714286	0.371969	1.37163	0.312146
RS30	PF3D7_0222600	rifin	19-325	62.1212		36.5366	-42.9108	71.8174	0.272258		-207.387	-1563.8	43.21	0.192478		52.8656	-7.81679	79.3942	0.0748006		-192.774	-1469.1	45.3721	0.209805		0.714286	0.371969	1.37163	0.312146
RS32	PF3D7_0222800	stevor	23-174	39.3939		38.7202	-47.849	74.601	0.275801		-207.212	-1563.06	43.2495	0.192737		42.9174	-37.8211	76.3576	0.212515		-193.542	-1472.74	45.2121	0.208613		0.633484	0.305687	1.31279	0.219471
RS227	PF3D7_1479500	stevor	198-259	60.6061		36.0148	-44.0956	71.5876	0.281027		-207.627	-1565.25	43.1713	0.192195		63.9076	15.4686	84.5896	0.0189263		-195.816	-1491.66	45.0216	0.206517		0.714286	0.371969	1.37163	0.312146
RS47	PF3D7_0324500	rifin	146-274	30.303		41.645	-56.3366	78.2181	0.284054		-194.727	-1506.66	45.9349	0.211588		50.2701	-33.3152	81.4495	0.165001		-180.742	-1419.56	48.1324	0.230896		0.605263	0.262976	1.39307	0.237794
RS174	PF3D7_1149900	stevor	23-176	24.2424		43.6829	-64.8086	80.7557	0.294627		-207.614	-1578.47	43.6234	0.194302		41.3417	-71.6884	79.9591	0.33029		-206.141	-1587.88	44.4732	0.19895		0.625	0.250557	1.55903	0.313554
RS188	PF3D7_1254400	rifin	24-336	34.8485		38.2903	-55.5272	75.515	0.306057		-208.746	-1578.15	43.197	0.191835		44.3997	-40.2258	77.9542	0.213626		-194.794	-1485	45.1714	0.207771		0.623188	0.287722	1.34979	0.230413
RS97	PF3D7_0713000	rifin	24-303	78.7879		34.4753	-47.562	70.9038	0.307435		-207.38	-1605.9	44.6143	0.19906		36.5778	-42.8698	71.8459	0.271788		-193.489	-1483.79	45.6142	0.210636		0.714286	0.371969	1.37163	0.312146
RS35	PF3D7_0223100	rifin	165-287	22.7273		-57.3434	-279.756	34.8082	0.31333		-135.549	-1288.93	60.0532	0.343963		-60.7583	-288.355	33.4546	0.291462		-125.577	-1190.22	60.5612	0.360573		1.4	0.719386	2.72454	0.321952
RS169	PF3D7_1101100	rifin	19-306	28.7879		39.51	-62.0392	77.4188	0.31736		-211.711	-1592.98	42.6077	0.187895		47.8939	-39.6455	80.5576	0.194959		-194.585	-1480.28	45.0854	0.207453		0.65097	0.284256	1.49077	0.309887
RS36	PF3D7_0223200	rifin	28-302	34.8485		-51.0082	-240.188	32.968	0.319902		-123.783	-1328.19	64.9355	0.394337		-61.1767	-263.406	28.5153	0.24985		-84.7208	-1057.36	70.5175	0.512179		1.3354	0.708261	2.51786	0.371378
RS118	PF3D7_0832800	rifin	19-263	68.1818		33.6512	-49.4026	70.5349	0.321896		-202.467	-1541.28	44.2594	0.199616		35.4817	-45.3106	71.3537	0.290122		-190.006	-1457.73	46.0089	0.214472		0.714286	0.371969	1.37163	0.312146
RS86	PF3D7_0632300	rifin	26-316	28.7879		39.1235	-63.0828	77.2757	0.323556		-200.43	-1533.69	44.752	0.20294		53.1105	-25.7123	82.5106	0.132273		-180.566	-1406.92	47.7628	0.229042		0.65097	0.284256	1.49077	0.309887
RS228	PF3D7_1479600	rifin	27-121	19.697		45.4814	-82.8303	83.743	0.325802		-205.82	-1554.98	43.4883	0.194458		52.5531	-59.1863	85.858	0.227356		-195.558	-1488.14	44.9954	0.206517		0.582418	0.204498	1.65875	0.3114
RS265	PF3D7_0113600	SURFIN 1.2, pseudogene	2-635	33.3333		36.9901	-58.7704	74.9938	0.32731		-199.867	-1532.32	44.9127	0.203988		42.7981	-44.1922	77.3077	0.23636		-181.006	-1421.66	48.1063	0.230592		0.666667	0.308908	1.43876	0.301564
RS94	PF3D7_0700500	rifin	25-314	33.3333		36.9518	-58.8648	74.9782	0.32794		-207.587	-1577.14	43.5887	0.194152		35.9784	-61.3485	74.5968	0.344362		-214.129	-1612.75	42.3867	0.18592		0.666667	0.308908	1.43876	0.301564
RS83	PF3D7_0632100	rifin	19-280	19.697		-58.5504	-299.673	37.1031	0.328546		-147.403	-1221.37	53.6782	0.28928		-47.7024	-272.412	41.4198	0.408463		-145.093	-1196.68	53.6737	0.291566		1.35897	0.676937	2.72819	0.388336
RS216	PF3D7_1400400	rifin	168-294	50		32.1868	-52.7232	69.8892	0.348408		-206.056	-1620.79	45.5658	0.204207		33.6406	-49.5044	70.5456	0.322394		-212.717	-1646	43.991	0.193823		0.714286	0.371969	1.37163	0.312146
RS111	PF3D7_0808800	rifin	28-327	56.0606		32.1267	-52.8431	69.8593	0.349449		-199.598	-1548.72	45.5582	0.207263		33.5356	-49.7141	70.4936	0.324157		-192.966	-1475.67	45.5287	0.210484		0.714286	0.371969	1.37163	0.312146
RS41	PF3D7_0300500	rifin	26-316	59.0909		32.0111	-53.0894	69.8053	0.351514		-207.725	-1564.47	43.1081	0.19186		49.1327	-16.3108	77.7537	0.10918		-188.253	-1446.28	46.2649	0.216734		0.714286	0.371969	1.37163	0.312146
RS79	PF3D7_0631800	rifin	23-300	28.7879		37.2557	-68.0897	76.5789	0.3539		-216.47	-1645.07	42.6077	0.185989		45.3763	-46.407	79.6202	0.229318		-218.092	-1679.87	43.1518	0.1878		0.65097	0.284256	1.49077	0.309887
RS202	PF3D7_1300900	stevor	21-178	75.7576		31.6336	-53.9819	69.646	0.358633		-217.909	-1663.74	42.6977	0.185831		32.9603	-51.0714	70.2503	0.334712		-212.297	-1607.92	42.8959	0.188967		0.714286	0.371969	1.37163	0.312146
RS212	PF3D7_1400200	rifin	23-321	53.0303		31.6026	-54.0442	69.6308	0.359177		-210.453	-1581.45	42.6797	0.188741		47.5912	-19.9768	77.1065	0.126274		-192.292	-1466.75	45.47	0.210545		0.714286	0.371969	1.37163	0.312146
RS139	PF3D7_0901600	stevor	28-178	33.3333		35.0125	-63.7998	74.2162	0.36086		-204.591	-1546.26	43.6444	0.195736		33.3939	-67.949	73.585	0.389137		-191.212	-1456.32	45.5095	0.211313		0.666667	0.308908	1.43876	0.301564
RS120	PF3D7_0832900	stevor	197-264	40.9091		32.6143	-57.5044	71.1701	0.362163		-209.521	-1586.02	43.178	0.191417		45.179	-28.2425	76.5651	0.165662		-188.25	-1454.7	46.5571	0.218227		0.722222	0.36136	1.44345	0.357004
RS231	PF3D7_1479800	rifin	26-301	46.9697		-44.8607	-223.495	35.1315	0.365939		-172.512	-1409.9	50.816	0.251118		-27.3482	-184.42	42.9802	0.555399		-161.848	-1337.02	52.2872	0.267809		1.33431	0.702778	2.53335	0.37794
RS91	PF3D7_0700300	rifin	159-273	36.3636		32.5383	-62.7714	72.04	0.381097		-209.197	-1585.36	43.2745	0.192		41.6025	-41.0235	75.8177	0.231785		-190.666	-1473.01	46.2896	0.215531		0.720588	0.349578	1.48536	0.374595
RS65	PF3D7_0421200	rifin	27-303	40.9091		31.2677	-60.6271	70.5895	0.386637		-226.046	-1752.14	42.6039	0.182359		30.6022	-62.207	70.3092	0.399043		-246.8	-1885.34	39.4209	0.162433		0.722222	0.36136	1.44345	0.357004
RS66	PF3D7_0425500	stevor	21-263	27.2727		34.8372	-74.5469	75.6731	0.39425		-206.451	-1557.28	43.3337	0.193459		35.2168	-73.5596	75.8189	0.387913		-193.847	-1470.21	45.0099	0.207458		0.701754	0.308205	1.59783	0.398869
RS229	PF3D7_1479600	rifin	145-307	18.1818		40.3789	-99.9278	82.2202	0.402179		-195.245	-1508.46	45.8055	0.210676		37.5264	-109.532	81.373	0.44611		-168.593	-1331.82	49.6152	0.247212		0.642857	0.228257	1.81052	0.402969
RS67	PF3D7_0425700	rifin	19-281	40.9091		30.3542	-62.824	70.21	0.40379		-202.824	-1555.65	44.6125	0.201137		36.551	-48.4502	72.8813	0.294184		-187.775	-1461.71	46.9722	0.220624		0.722222	0.36136	1.44345	0.357004
RS62	PF3D7_0402600	stevor	21-261	22.7273		36.5178	-85.762	78.3056	0.406828		-195.414	-1509.44	45.7767	0.210447		39.5926	-76.796	79.3601	0.357591		-174.897	-1370.49	48.6099	0.23725		0.68	0.274786	1.68276	0.404159
RS218	PF3D7_1400600	rifin	19-325	36.3636		30.4463	-67.7534	71.1618	0.418929		-212.701	-1597.23	42.3872	0.186494		32.1491	-63.6819	71.8739	0.388001		-207.675	-1563.11	43.0803	0.191753		0.720588	0.349578	1.48536	0.374595
RS103	PF3D7_0732400	rifin	27-152	83.3333		28.1537	-60.4314	67.8249	0.419845		-234.567	-1775.89	40.3295	0.169765		32.3745	-51.0604	69.726	0.340094		-203.157	-1607.98	46.1911	0.208619		0.846154	0.445369	1.6076	0.609939
RS257	PF3D7_0402200	SURFIN 4.1, pseudogene	1071-1604	31.8182		31.4924	-72.6133	72.8104	0.422445		-204.7	-1547.83	43.6579	0.19575		36.0479	-61.1764	74.6249	0.343198		-193.363	-1471.7	45.2428	0.208858		0.714286	0.332351	1.53514	0.388713
RS225	PF3D7_1479400	rifin	145-316	40.9091		29.1844	-65.501	69.699	0.425592		-207.397	-1562.58	43.1648	0.192264		34.9713	-52.0296	72.1848	0.320623		-193.437	-1471.48	45.2076	0.208646		0.722222	0.36136	1.44345	0.357004
RS235	PF3D7_0200400	stevor	24-181	27.2727		32.9905	-79.516	74.9868	0.425889		-207.527	-1563.79	43.1579	0.192176		32.7782	-80.1299	74.9139	0.429672		-196.108	-1488.2	44.7926	0.205249		0.701754	0.308205	1.59783	0.398869
RS125	PF3D7_0900200	rifin	19-333	45.4545		28.3642	-63.7328	68.6582	0.428998		-202.844	-1547.61	44.3352	0.199803		37.9571	-41.8837	72.8699	0.258037		-186.966	-1444.45	46.6806	0.219586		0.72	0.368631	1.40628	0.336169
RS112	PF3D7_0808900	rifin	25-147	50		27.7312	-62.7599	67.9111	0.433014		-203.027	-1552.16	44.4209	0.200127		27.5944	-63.1278	67.8622	0.435905		-204.261	-1553.63	44.0169	0.197641		0.714286	0.371969	1.37163	0.312146
RS148	PF3D7_1000500	rifin	24-326	40.9091		28.77	-66.4782	69.5232	0.433488		-207.974	-1565.75	43.0599	0.191531		40.9266	-38.1565	74.7412	0.224621		-192.115	-1466.12	45.5143	0.210859		0.722222	0.36136	1.44345	0.357004
RS224	PF3D7_1479400	rifin	26-121	40.9091		28.77	-66.4782	69.5232	0.433488		-207.035	-1562.59	43.2991	0.193044		34.48	-53.1943	71.9776	0.329219		-192.681	-1469.5	45.4207	0.210096		0.722222	0.36136	1.44345	0.357004
RS87	PF3D7_0632400	rifin	19-334	34.8485		29.072	-71.0765	70.5934	0.444463		-208.442	-1572.33	43.1114	0.191569		43.7287	-35.8075	76.6842	0.200864		-192.392	-1471.24	45.589	0.211086		0.769821	0.374714	1.58154	0.476391
RS104	PF3D7_0732400	rifin	176-339	89.3939		26.9047	-63.2568	67.2729	0.444612		-199.903	-1706.18	50.2032	0.230573		30.6832	-54.8957	68.9803	0.371681		-182.658	-1569.36	52.1401	0.251496		0.846154	0.445369	1.6076	0.609939
RS46	PF3D7_0324500	rifin	27-122	36.3636		29.0285	-71.1975	70.5781	0.445326		-230.35	-1738.32	40.6356	0.172408		37.4202	-51.0331	74.0704	0.297081		-220.448	-1666.48	41.8693	0.181188		0.720588	0.349578	1.48536	0.374595
RS11	PF3D7_0115200	rifin	19-325	7.57576		53.8519	-241.796	93.7693	0.449084		-207.975	-1566.88	43.0981	0.191707		56.8565	-219.606	94.1761	0.410646		-222.609	-1679.32	41.5075	0.178814		0.530435	0.0892305	3.15319	0.485681
RS190	PF3D7_1254600	stevor	24-177	22.7273		33.9077	-93.3998	77.4137	0.449686		-220.984	-1658.03	41.3943	0.178911		51.0814	-43.2275	83.2921	0.192062		-191.593	-1470.26	45.8522	0.212827		0.68	0.274786	1.68276	0.404159
RS10	PF3D7_0114700	rifin	23-292	78.7879		26.6402	-63.8381	67.1526	0.449845		-198.718	-1578.82	46.8481	0.214082		11.8482	-96.3378	60.4216	0.757576		-225.551	-1690.99	40.8243	0.174829		0.846154	0.445369	1.6076	0.609939
RS152	PF3D7_1040100	rifin	26-266	40.9091		-36.2633	-204.284	38.9791	0.450321		-233.081	-1710.01	38.7059	0.163562		-18.1934	-163.953	47.0752	0.683452		-209.846	-1562.15	42.2407	0.186992		1.22222	0.647332	2.30767	0.536029
RS5	PF3D7_0100900	rifin	23-307	81.8182		26.5314	-64.0368	67.095	0.451864		-219.105	-1644.24	41.6204	0.180594		45.6832	-22.4349	75.903	0.141062		-187.797	-1451.23	46.6053	0.218728		0.846154	0.445369	1.6076	0.609939
RS6	PF3D7_0101000	rifin	28-315	86.3636		26.445	-64.2304	67.0564	0.453593		-228.164	-1723.7	40.9486	0.174464		30.2165	-55.8572	68.7552	0.380193		-238.129	-1771.02	38.8935	0.162811		0.846154	0.445369	1.6076	0.609939
RS167	PF3D7_1100500	rifin	26-146	31.8182		29.7478	-77.0426	72.1232	0.454039		-209.505	-1578.99	42.9458	0.190356		33.9718	-66.4717	73.8111	0.378986		-204.081	-1542.82	43.7154	0.196299		0.714286	0.332351	1.53514	0.388713
RS185	PF3D7_1254200	rifin	19-308	43.9394		26.7609	-67.3945	67.9561	0.460247		-210.571	-1610.87	43.6226	0.193026		36.0206	-46.2825	72.0174	0.289838		-202.376	-1534.48	44.061	0.198713		0.765517	0.392384	1.49348	0.433256
RS123	PF3D7_0833200	rifin	23-313	40.9091		-34.2074	-199.691	39.8993	0.472882		-254.433	-1853.31	35.6874	0.146206		-15.9099	-158.837	48.0944	0.718703		-230.328	-1700.05	39.3812	0.167182		1.22222	0.647332	2.30767	0.536029
RS64	PF3D7_0413300	rifin	26-303	40.9091		-33.7335	-198.626	40.1102	0.478208		-242.8	-1782.72	37.5843	0.156309		-15.3622	-157.608	48.3383	0.727352		-217.263	-1624.29	41.6248	0.181305		1.22222	0.647332	2.30767	0.536029
RS241	PF3D7_1477600	SURFIN 14.1	371-904	74.2424		25.1443	-67.1358	66.4741	0.479778		-194.545	-1548.19	47.3622	0.218868		43.1402	-28.155	74.7724	0.173304		-205.546	-1587.16	44.6654	0.200133		0.846154	0.445369	1.6076	0.609939
RS77	PF3D7_0617600	stevor	201-262	30.303		28.0825	-81.1927	71.4551	0.484418		-208.565	-1568.95	42.9508	0.190776		38.9914	-53.7349	75.7892	0.294664		-192.967	-1470.23	45.3394	0.209543		0.766667	0.358432	1.63986	0.493381
RS243	PF3D7_1477600	SURFIN 14.1	1443-1953	87.8788		24.8181	-67.9242	66.3401	0.486591		-237.254	-1934.51	44.0945	0.184912		27.8533	-61.227	67.7155	0.426181		-217.508	-1848.23	48.2549	0.211966		0.846154	0.445369	1.6076	0.609939
RS181	PF3D7_1253700	rifin	28-322	53.0303		-31.5841	-193.888	41.0851	0.503188		-152.512	-1288.97	54.0938	0.286924		31.2324	-54.8712	69.4651	0.366021		-187.712	-1463.44	47.0538	0.22108		1.18182	0.622044	2.24533	0.609939
RS250	PF3D7_0800700	SURFIN 8.3	853-1388	74.2424		23.8982	-69.9203	65.9165	0.505178		-206.083	-1565.37	43.7441	0.195539		43.5297	-27.2603	74.9419	0.168059		-201.271	-1524.28	44.1203	0.199509		0.846154	0.445369	1.6076	0.609939
RS230	PF3D7_1479700	rifin	19-305	72.7273		23.6698	-70.4387	65.8158	0.509888		-226.302	-1760.89	42.7838	0.183056		54.6622	-3.76757	80.1912	0.0611483		-256.971	-1855.04	34.8208	0.142477		0.846154	0.445369	1.6076	0.609939
RS258	PF3D7_0402200	SURFIN 4.1, pseudogene	537-1070	86.3636		23.6698	-70.4387	65.8158	0.509888		-226.079	-1797.06	43.9515	0.188318		26.364	-64.4683	67.0316	0.455407		-244.111	-1989.11	43.3191	0.179276		0.846154	0.445369	1.6076	0.609939
RS15	PF3D7_0115600	rifin	19-336	50		-31.0023	-192.581	41.3441	0.510092		-273.203	-1992.63	33.4425	0.134353		16.0081	-87.5537	62.3861	0.670388		-218.69	-1645.77	41.823	0.181641		1.18182	0.622044	2.24533	0.609939
RS176	PF3D7_1150200	rifin	23-295	34.8485		25.501	-79.6638	69.1084	0.512186		-210.467	-1579.65	42.6134	0.188433		39.9554	-44.8559	75.1107	0.256279		-194.711	-1480.12	45.0331	0.207132		0.769821	0.374714	1.58154	0.476391
RS82	PF3D7_0632000	rifin	22-327	33.3333		-31.8017	-201.263	42.3372	0.512684		-174.404	-1362.19	48.5037	0.237003		-12.5416	-157.275	50.7701	0.779418		-178.006	-1376.79	47.6655	0.230134		1.2	0.627175	2.29601	0.581817
RS267	PF3D7_0113100	SURFIN 1.1	331-935	21.2121		-36.1731	-243.221	45.9733	0.51272		-183.445	-1430.65	47.5117	0.225959		-69.8186	-328.685	32.7283	0.262341		-149.419	-1223.26	52.9873	0.283055		1.2381	0.608149	2.52057	0.555983
RS102	PF3D7_0732300	rifin	24-295	87.8788		23.4595	-70.9352	65.7271	0.51429		-206.115	-1564.97	43.719	0.195407		52.5931	-8.45983	79.2788	0.0771208		-181.493	-1414.61	47.684	0.228052		0.846154	0.445369	1.6076	0.609939
RS71	PF3D7_0532900	rifin	25-125	59.0909		23.4213	-70.9729	65.7004	0.51493		-206.147	-1555.2	43.375	0.193785		26.1503	-64.915	66.9298	0.459583		-190.596	-1454.48	45.6758	0.212475		0.846154	0.445369	1.6076	0.609939
RS48	PF3D7_0324600	stevor	21-174	7.57576		48.534	-281.255	93.0526	0.515612		-213.109	-1600.92	42.3623	0.186218		63.3795	-171.423	95.0591	0.325635		-203.767	-1536.35	43.6096	0.195942		0.530435	0.0892305	3.15319	0.485681
RS122	PF3D7_0833100	rifin	23-325	63.6364		23.0047	-71.906	65.5144	0.523521		-196.553	-1547.44	46.6181	0.214051		25.6294	-66.0846	66.6978	0.470078		-164.588	-1364.78	52.2066	0.265109		0.846154	0.445369	1.6076	0.609939
RS213	PF3D7_1400300	rifin	27-117	43.9394		23.5764	-74.6756	66.5634	0.523791		-207.113	-1559.96	43.1806	0.19246		32.21	-54.9933	70.3504	0.356855		-192.462	-1465.2	45.3525	0.209871		0.765517	0.392384	1.49348	0.433256
RS98	PF3D7_0732000	stevor	24-174	69.697		-29.8321	-189.921	41.8587	0.524168		-232.57	-1730.11	39.5647	0.167232		-3.4507	-130.41	53.5522	0.933824		-211.703	-1595.02	42.6798	0.188227		1.18182	0.622044	2.24533	0.609939
RS260	PF3D7_0115000	SURFIN 1.3	1354-1925	74.2424		22.8207	-72.3339	65.4354	0.527371		-165.859	-1508.91	56.0691	0.287109		42.3713	-29.864	74.4266	0.18366		-228.024	-1830.63	44.2669	0.189		0.846154	0.445369	1.6076	0.609939
RS38	PF3D7_0300200	rifin	19-283	37.8788		-29.7395	-192.257	42.4058	0.52977		-317.02	-2272.05	26.6855	0.107401		-5.17752	-136.917	53.3072	0.903029		-282.552	-2059.85	32.2426	0.128706		1.17143	0.616923	2.22434	0.628657
RS255	PF3D7_0424400	SURFIN 4.2	2-594	53.0303		22.6731	-72.6471	65.366	0.530373		-204.393	-1608.13	45.7566	0.205911		41.3291	-32.2699	73.9753	0.198566		-176.649	-1408.47	49.2636	0.239642		0.846154	0.445369	1.6076	0.609939
RS198	PF3D7_1300400	rifin	19-300	71.2121		22.448	-73.1505	65.2654	0.535034		-205.203	-1554.93	43.7145	0.195792		24.8664	-67.7908	66.3566	0.485528		-191.624	-1465.27	45.668	0.211888		0.846154	0.445369	1.6076	0.609939
RS246	PF3D7_0831100	SURFIN 8.1	363-866	75.7576		22.3736	-73.3107	65.2308	0.536558		-216.647	-1637.73	42.301	0.184546		41.8504	-31.0484	74.1975	0.190963		-196.286	-1498.87	45.0954	0.206643		0.846154	0.445369	1.6076	0.609939
RS133	PF3D7_0901000	rifin	26-117	25.7576		26.2748	-97.49	72.4776	0.544293		-184.371	-1429.22	47.1189	0.223356		23.2785	-105.548	71.3634	0.598185		-177.318	-1374.56	47.8456	0.231536		0.758514	0.335361	1.7156	0.50685
RS42	PF3D7_0300700	rifin	25-325	39.3939		23.0204	-79.9061	67.0614	0.545802		-217.697	-1653.12	42.4277	0.184705		27.2377	-70.0953	68.8742	0.463		-213.294	-1626.29	43.1422	0.189683		0.769231	0.385719	1.53406	0.456303
RS109	PF3D7_0800400	rifin	19-287	59.0909		-28.0052	-185.953	42.6993	0.547129		-245.39	-1768.58	36.1579	0.150155		12.3571	-95.7676	60.7633	0.747697		-221.781	-1643.73	40.6199	0.17527		1.18182	0.622044	2.24533	0.609939
RS136	PF3D7_0901300	rifin	19-335	33.3333		23.0678	-85.5503	68.1026	0.559345		-204.267	-1544.13	43.6917	0.196104		30.3199	-68.1041	71.1172	0.421404		-191.447	-1460.96	45.5838	0.21156		0.823529	0.402412	1.68534	0.59515
RS44	PF3D7_0324400	rifin	25-158	30.303		-28.5251	-200.433	45.017	0.562405		-186.273	-1431.35	46.4837	0.218969		-15.0131	-168.872	50.8018	0.746816		-188.511	-1437.21	45.851	0.214491		1.15	0.590321	2.24031	0.681235
RS21	PF3D7_0200600	rifin	26-332	63.6364		-26.371	-182.152	43.4007	0.567922		-118.944	-1189.25	62.8185	0.386338		14.8853	-90.0199	61.875	0.694082		-139.645	-1279.11	58.3573	0.327663		1.18182	0.622044	2.24533	0.609939
RS116	PF3D7_0832400	stevor	200-264	62.1212		-26.3332	-182.135	43.431	0.568532		-112.422	-1117.37	62.9339	0.397668		21.844	-74.5208	64.9993	0.547629		-154.571	-1313.5	54.1519	0.285365		1.18182	0.622044	2.24533	0.609939
RS85	PF3D7_0632200	rifin	168-334	12.1212		34.2732	-179.595	84.549	0.569963		-212.543	-1593.73	42.3266	0.186284		29.5374	-199.814	83.4398	0.635613		-229.504	-1711.68	40.0706	0.170314		0.659091	0.189863	2.28797	0.51148
RS2	PF3D7_0100400	rifin	19-329	78.7879		20.5773	-77.3129	64.4246	0.573957		-211.508	-1593.14	42.6882	0.188345		49.8607	-14.6795	78.0784	0.101949		-183.773	-1433.46	47.4864	0.225629		0.846154	0.445369	1.6076	0.609939
RS88	PF3D7_0632700	rifin	19-333	34.8485		22.312	-87.3799	67.7904	0.574097		-212.605	-1612.41	42.933	0.189011		43.0811	-37.4061	76.422	0.210107		-182.123	-1422.2	47.7116	0.227812		0.769821	0.374714	1.58154	0.476391
RS266	PF3D7_0113100	SURFIN 1.1	936-1555	72.7273		20.0805	-78.4227	64.2023	0.584369		-195.873	-1507.26	45.5342	0.209011		39.3016	-36.7243	73.0531	0.228204		-192.975	-1513.57	46.8045	0.216885		0.846154	0.445369	1.6076	0.609939
RS58	PF3D7_0401200	rifin	19-332	46.9697		20.2622	-79.5467	64.588	0.584554		-206.432	-1635.8	45.9036	0.205661		32.5141	-52.0339	70.0439	0.342623		-181.569	-1485.55	49.9976	0.240409		0.806452	0.420242	1.5476	0.517744
RS184	PF3D7_1254100	stevor	198-255	42.4242		20.4069	-81.8954	65.1719	0.588334		-207.556	-1563.76	43.1463	0.19211		35.3558	-47.776	71.7216	0.301042		-192.165	-1467.33	45.5377	0.21095		0.814286	0.418007	1.58624	0.545936
RS117	PF3D7_0832500	rifin	26-283	54.5455		-24.8086	-178.66	44.0997	0.588668		-154.136	-1289.6	53.5226	0.281918		0.333309	-121.928	55.2402	0.993478		-135.909	-1185.35	56.7021	0.32108		1.18182	0.622044	2.24533	0.609939
RS201	PF3D7_1300700	rifin	23-326	60.6061		19.8215	-79.0327	64.0926	0.589888		-224.84	-1692.5	41.1318	0.176395		38.4001	-38.8982	72.6811	0.242835		-186.264	-1441.75	46.848	0.220849		0.846154	0.445369	1.6076	0.609939
RS175	PF3D7_1150000	rifin	27-326	28.7879		21.7501	-97.1511	68.9423	0.602918		-195.875	-1499.76	45.2779	0.207746		31.9313	-71.5138	72.9856	0.414623		-190.455	-1457.53	45.8347	0.21335		0.824561	0.387625	1.75402	0.616443
RS147	PF3D7_1000400	rifin	19-328	56.0606		18.9021	-81.0437	63.6725	0.609121		-207.008	-1559.64	43.2083	0.192634		52.0082	-9.79606	79.0228	0.0820983		-194.852	-1482.84	45.0746	0.207264		0.846154	0.445369	1.6076	0.609939
RS237	PF3D7_1301800	SURFIN 13.1, pseudogene	2-657	56.0606		-23.2167	-175.114	44.8143	0.610456		-179.665	-1423.9	48.6759	0.234485		3.60183	-114.657	56.7094	0.928439		-160.881	-1313.8	51.8609	0.266099		1.18182	0.622044	2.24533	0.609939
RS177	PF3D7_1150300	rifin	19-298	28.7879		21.2408	-98.4313	68.7398	0.612536		-195.785	-1493.17	45.085	0.206843		38.7608	-54.3201	75.6983	0.29838		-190.231	-1452.86	45.7557	0.213073		0.824561	0.387625	1.75402	0.616443
RS182	PF3D7_1254000	rifin	24-303	46.9697		18.0242	-84.583	63.5934	0.631288		-268.806	-1985.25	34.7712	0.139793		29.8231	-58.0602	68.8423	0.392619		-277.563	-2068.38	34.2578	0.13631		0.806452	0.420242	1.5476	0.517744
RS49	PF3D7_0324600	stevor	198-261	28.7879		20.1066	-101.295	68.2905	0.633993		-186.692	-1484.98	48.1432	0.227335		21.3094	-98.2891	68.7718	0.611299		-175.902	-1394.41	49.0623	0.239043		0.824561	0.387625	1.75402	0.616443
RS81	PF3D7_0631900	stevor	198-263	19.697		22.935	-125.493	73.6621	0.634366		-206.623	-1558.99	43.3285	0.19336		21.6128	-129.383	73.2127	0.656685		-187.923	-1444.71	46.3332	0.217267		0.815385	0.336286	1.97704	0.651526
RS154	PF3D7_1040200	stevor	206-265	22.7273		-24.9832	-214.929	50.3989	0.636245		-183.185	-1420.39	47.2545	0.224768		-26.1432	-217.909	49.9477	0.6224		-149.114	-1220.29	52.9967	0.283404		1.13333	0.550187	2.33456	0.734262
RS132	PF3D7_0900900	stevor	205-260	57.5758		-21.2809	-170.776	45.6781	0.637769		-195.224	-1485.3	45.0217	0.206816		17.1199	-85.0389	62.8775	0.646791		-195.454	-1480.33	44.7628	0.20543		1.18182	0.622044	2.24533	0.609939
RS43	PF3D7_0300800	rifin	23-280	28.7879		19.8442	-101.948	68.185	0.638941		-208.079	-1562.39	42.9061	0.190777		20.9658	-99.1395	68.633	0.617763		-193.891	-1469.8	44.9789	0.207282		0.824561	0.387625	1.75402	0.616443
RS138	PF3D7_0901500	rifin	25-322	51.5152		17.4327	-84.3232	63.0141	0.640138		-207.792	-1566.76	43.1616	0.19208		18.2825	-82.4494	63.3994	0.622241		-165.726	-1361.69	51.6929	0.261219		0.846154	0.445369	1.6076	0.609939
RS252	PF3D7_0424400	SURFIN 4.2	1797-2380	60.6061		17.426	-84.3493	63.0134	0.640304		-215.635	-1606.66	41.6254	0.181929		31.3262	-54.6786	69.5104	0.364347		-220.448	-1638.07	40.919	0.177039		0.846154	0.445369	1.6076	0.609939
RS75	PF3D7_0600700	rifin	19-306	33.3333		18.8539	-95.6915	66.3517	0.641818		-190.284	-1469.91	46.3252	0.21592		32.9295	-61.7842	72.1948	0.373955		-186.087	-1431.43	46.5559	0.219447		0.823529	0.402412	1.68534	0.59515
RS151	PF3D7_1040000	rifin	28-317	42.4242		-20.7296	-169.535	45.923	0.645715		-215.94	-1608.35	41.5706	0.18157		-0.644378	-124.705	54.9218	0.987495		-209.974	-1572.43	42.5483	0.18834		1.14835	0.607019	2.17244	0.670642
RS226	PF3D7_1479500	stevor	23-174	34.8485		18.6522	-96.2424	66.2791	0.645904		-223.054	-1663.95	40.8351	0.175746		15.9824	-102.761	65.1857	0.698446		-233.095	-1730.09	39.3732	0.16628		0.769821	0.374714	1.58154	0.476391
RS268	PF3D7_0424400	SURFIN 4.2	765-1194	33.3333		18.5622	-96.4058	66.2325	0.647571		-210.682	-1582.16	42.6195	0.188372		24.7993	-81.3919	68.8236	0.525805		-202.626	-1528.76	43.7714	0.197224		0.823529	0.402412	1.68534	0.59515
RS150	PF3D7_1000600	rifin	145-296	62.1212		16.9764	-85.3489	62.8111	0.649803		-236.599	-1744.28	38.5676	0.161951		35.0697	-46.2257	71.1682	0.297133		-207.94	-1567.47	43.131	0.191874		0.846154	0.445369	1.6076	0.609939
RS244	PF3D7_0831100	SURFIN 8.1	1369-1921	66.6667		16.5503	-86.3446	62.6292	0.658916		-206.984	-1575.27	43.7467	0.195153		17.1885	-85.0001	62.9311	0.645595		-190.161	-1472.34	46.4535	0.216638		0.846154	0.445369	1.6076	0.609939
RS137	PF3D7_0901400	rifin	22-307	37.8788		17.204	-93.4842	64.5699	0.662889		-204.255	-1541.88	43.619	0.195767		27.795	-68.7771	69.1098	0.452204		-193.713	-1472.49	45.14	0.208169		0.82	0.412243	1.63108	0.571668
RS259	PF3D7_0402200	SURFIN 4.1, pseudogene	2-536	27.2727		-21.3986	-192.791	49.665	0.665963		-197.179	-1497.1	44.7026	0.20428		0.367179	-140.309	58.692	0.993466		-193.099	-1467.14	45.1821	0.208694		1.09804	0.548683	2.19743	0.791608
RS205	PF3D7_1372700	rifin	23-305	22.7273		-22.4991	-208.7	51.3896	0.666953		-200.737	-1523.98	44.308	0.200658		-72.1584	-334.563	31.797	0.250177		-182.81	-1413.72	47.162	0.224509		1.13333	0.550187	2.33456	0.734262
RS146	PF3D7_1000300	rifin	25-302	45.4545		16.2903	-88.4761	62.8212	0.667628		-221.762	-1661.53	41.2266	0.177899		20.0537	-80.0245	64.497	0.588916		-209.542	-1581.58	43.0202	0.190682		0.857143	0.447028	1.64351	0.642567
RS84	PF3D7_0632200	rifin	19-144	19.697		20.3189	-133.156	72.7689	0.678409		-209.19	-1573.66	42.8805	0.190188		29.6868	-105.789	75.9757	0.52034		-193.808	-1478.5	45.3132	0.208977		0.815385	0.336286	1.97704	0.651526
RS39	PF3D7_0300400	stevor	23-177	24.2424		18.7424	-117.659	69.6644	0.679716		-228.065	-1687.45	39.7876	0.169601		23.4507	-105.089	71.428	0.595092		-231.107	-1710.24	39.4379	0.16717		0.822368	0.366413	1.8457	0.635403
RS221	PF3D7_1400800	rifin	27-118	24.2424		17.6959	-120.494	69.2783	0.698507		-196.039	-1505.28	45.4059	0.208294		10.4641	-139.923	66.5864	0.82604		-185.453	-1425.11	46.5723	0.219895		0.822368	0.366413	1.8457	0.635403
RS80	PF3D7_0631900	stevor	23-174	24.2424		17.6959	-120.494	69.2783	0.698507		-174.717	-1378.57	48.9578	0.23927		22.1553	-108.612	70.9518	0.618503		-166.306	-1317.65	49.9741	0.250929		0.822368	0.366413	1.8457	0.635403
RS108	PF3D7_0732900	rifin	19-296	40.9091		14.776	-94.777	62.7105	0.704597		-222.153	-1671.22	41.4061	0.178537		21.5357	-79.3649	65.6753	0.565336		-213.502	-1614.11	42.6618	0.187414		0.866667	0.445729	1.68513	0.673172
RS33	PF3D7_0222800	stevor	198-264	33.3333		15.5712	-103.635	64.9952	0.70632		-191.623	-1466.23	45.7015	0.212055		11.5826	-113.291	63.3475	0.784091		-165.135	-1303.46	49.912	0.251463		0.823529	0.402412	1.68534	0.59515
RS61	PF3D7_0401600	rifin	25-253	6.06061		-31.719	-460.823	69.0635	0.709357		-206.375	-1559.99	43.4542	0.194054		5.00551	-304.415	77.6864	0.94461		-192.024	-1467.82	45.6072	0.211371		1.40909	0.500113	3.97018	0.516412
RS195	PF3D7_1255000	rifin	143-302	57.5758		14.1059	-91.7619	61.5263	0.710583		-203.455	-1532.98	43.6092	0.196081		43.7834	-28.6433	75.4336	0.172683		-193.067	-1473.39	45.4118	0.20985		0.846154	0.445369	1.6076	0.609939
RS127	PF3D7_0900400	rifin	19-300	42.4242		14.2887	-95.9382	62.5064	0.714741		-218.034	-1629.74	41.5256	0.180577		21	-80.68	65.4583	0.576527		-207.375	-1562.58	43.173	0.192312		0.814286	0.418007	1.58624	0.545936
RS55	PF3D7_0400800	stevor	198-249	45.4545		14.0449	-93.5384	61.8253	0.714763		-223.412	-1676.27	41.1151	0.176826		25.2549	-68.3513	66.8145	0.482282		-195.687	-1509.38	45.6745	0.2098		0.857143	0.447028	1.64351	0.642567
RS69	PF3D7_0500400	rifin	19-331	33.3333		15.0431	-104.923	64.7786	0.716684		-211.811	-1586.48	42.35	0.186686		20.5831	-91.625	67.0865	0.60809		-208.405	-1564.78	42.8668	0.190457		0.823529	0.402412	1.68534	0.59515
RS135	PF3D7_0901100	rifin	20-326	27.2727		15.7059	-112.383	66.5439	0.717062		-195.193	-1487.48	45.1085	0.207258		33.4651	-67.7	73.6023	0.387677		-188.115	-1439.67	46.0855	0.215899		0.888889	0.420523	1.87891	0.757756
RS263	PF3D7_0113600	SURFIN 1.2, pseudogene	1271-1893	45.4545		13.8045	-94.0849	61.7195	0.719812		-211.426	-1585.16	42.4469	0.187282		16.9064	-87.1371	63.1044	0.654801		-199.289	-1506.63	44.2472	0.201053		0.857143	0.447028	1.64351	0.642567
RS40	PF3D7_0300400	stevor	198-256	34.8485		-16.2528	-165.709	49.1373	0.721042		-266.874	-1964.45	34.8027	0.140299		-6.79611	-144.128	53.281	0.876134		-287.802	-2085.8	31.1965	0.124499		1.12174	0.583773	2.15546	0.730286
RS222	PF3D7_1400800	rifin	142-273	59.0909		13.4173	-93.2911	61.2162	0.725136		-215.802	-1611.95	41.7441	0.182392		32.9877	-50.9078	70.2424	0.333817		-184.584	-1440.89	47.4407	0.224907		0.846154	0.445369	1.6076	0.609939
RS27	PF3D7_0201300	stevor	202-265	59.0909		13.1134	-93.9686	61.0799	0.731558		-199.044	-1514.11	44.5965	0.202855		12.3332	-95.7353	60.7354	0.748069		-121.756	-1171.25	61.317	0.371368		0.846154	0.445369	1.6076	0.609939
RS168	PF3D7_1100500	rifin	170-284	33.3333		14.1222	-107.13	64.3943	0.734669		-189.508	-1459.69	46.2619	0.216025		19.2886	-94.7121	66.5438	0.633415		-186.477	-1428.67	46.3132	0.217979		0.823529	0.402412	1.68534	0.59515
RS196	PF3D7_1255100	rifin	19-307	51.5152		12.6819	-94.9891	60.8981	0.740762		-229.026	-1695.93	39.7202	0.169006		30.8295	-55.9817	69.3261	0.374313		-205.943	-1553.07	43.3773	0.193885		0.846154	0.445369	1.6076	0.609939
RS247	PF3D7_0830800	SURFIN 8.2	1304-2049	51.5152		12.5665	-95.2101	60.839	0.74314		-229.942	-1708.94	39.8201	0.169126		30.8922	-55.6513	69.3168	0.372425		-202.183	-1530.44	43.9938	0.198483		0.846154	0.445369	1.6076	0.609939
RS211	PF3D7_1373400	rifin	19-334	40.9091		12.8778	-99.1521	61.887	0.743807		-220.903	-1643.43	40.9335	0.176938		19.3478	-84.4558	64.7353	0.610446		-214.545	-1601.95	41.8675	0.183429		0.866667	0.445729	1.68513	0.673172
RS14	PF3D7_0115400	stevor	202-261	48.4848		12.3401	-95.7152	60.7376	0.747916		-218.406	-1645.9	41.9313	0.182228		37.6522	-40.5668	72.3459	0.254696		-186.032	-1439.93	46.8717	0.221105		0.899038	0.473283	1.70779	0.745101
RS8	PF3D7_0101800	stevor	21-174	78.7879		12.0539	-95.8728	60.5126	0.75322		-191.327	-1671.94	52.1025	0.245711		16.2291	-86.685	62.4096	0.664924		-200.132	-1735.7	50.9293	0.234251		1	0.528189	1.89326	1
RS200	PF3D7_1300600	rifin	29-302	78.7879		-13.7383	-153.968	49.063	0.753458		-141.361	-1335.29	59.4121	0.332708		27.29	-62.3951	67.4452	0.436966		-186.687	-1448.31	46.9167	0.22096		1.18182	0.622044	2.24533	0.609939
RS70	PF3D7_0500500	rifin	24-266	45.4545		12.0424	-98.0717	60.9407	0.756708		-236.528	-1752.29	38.8591	0.163146		22.866	-73.7634	65.76	0.530951		-217.293	-1637.81	42.068	0.183258		0.857143	0.447028	1.64351	0.642567
RS24	PF3D7_0201000	rifin	137-269	48.4848		11.7544	-97.0237	60.4754	0.760261		-250.487	-1902.23	38.6477	0.158387		19.2762	-80.3018	63.8587	0.601479		-208.413	-1637.08	45.2423	0.201577		0.899038	0.473283	1.70779	0.745101
RS28	PF3D7_0221400	stevor	27-229	40.9091		11.9268	-101.309	61.4677	0.763331		-204.386	-1544.22	43.6505	0.195856		18.0941	-87.2778	64.1785	0.636191		-192.829	-1467.72	45.3036	0.209437		0.866667	0.445729	1.68513	0.673172
RS63	PF3D7_0413200	rifin	24-333	45.4545		11.6193	-99.0057	60.7491	0.765508		-244.751	-1844.49	38.8768	0.160848		22.2843	-75.0233	65.4918	0.542763		-242.293	-1821.81	39.0343	0.162168		0.857143	0.447028	1.64351	0.642567
RS214	PF3D7_1400300	rifin	141-299	56.0606		11.2998	-98.0431	60.2726	0.769836		-229.522	-1703.43	39.7897	0.169135		29.8231	-58.0602	68.8423	0.392619		-219.021	-1639.24	41.4837	0.180024		0.846154	0.445369	1.6076	0.609939
RS140	PF3D7_0901600	stevor	202-263	36.3636		11.3146	-107.253	62.0508	0.781588		-194.166	-1482.4	45.3151	0.208802		20.8335	-85.0298	66.128	0.589651		-186.252	-1426.85	46.3338	0.218212		0.875	0.441232	1.7352	0.702267
RS134	PF3D7_0901000	rifin	141-266	40.9091		-11.2685	-150.579	50.5917	0.796572		-240.707	-1765.4	37.7714	0.157615		13.904	-93.8917	61.7697	0.71778		-223.026	-1659.86	40.708	0.17521		1.03175	0.540591	1.96914	0.924498
RS215	PF3D7_1400400	rifin	23-144	24.2424		-12.6531	-183.862	55.2926	0.800519		-210.372	-1582.15	42.7337	0.189022		-9.56512	-176.126	56.5252	0.846414		-199.433	-1511.98	44.379	0.201619		1.04167	0.500673	2.16722	0.913036
RS240	PF3D7_1301800	SURFIN 13.1, pseudogene	1343-1626	86.3636		9.77789	-100.896	59.4815	0.801097		-208.926	-1705.14	47.1315	0.210455		26.364	-64.4683	67.0316	0.455407		-210.623	-1752.28	47.9094	0.213466		1	0.528189	1.89326	1
RS144	PF3D7_0937700	rifin	19-324	34.8485		10.1071	-110.06	61.5314	0.805648		-204.397	-1559.08	44.1512	0.198215		19.5176	-88.1025	65.5644	0.616166		-183.491	-1435.87	47.6731	0.226778		0.934783	0.473049	1.8472	0.846123
RS217	PF3D7_1400500	rifin	27-296	22.7273		11.5642	-136.862	66.9813	0.806856		-188.855	-1443.98	45.9599	0.214853		14.1832	-129.862	67.9611	0.760922		-186.098	-1418.24	46.0874	0.217039		0.894737	0.402269	1.9901	0.785084
RS107	PF3D7_0732700	rifin	142-316	31.8182		10.2466	-116.462	62.7848	0.809805		-224.911	-1678.67	40.6481	0.174297		23.6607	-84.1545	68.3543	0.547899		-216.737	-1632.7	42.1006	0.183617		0.882353	0.433086	1.79767	0.730312
RS54	PF3D7_0400800	stevor	23-174	45.4545		9.47966	-103.847	59.8034	0.809974		-228.101	-1698.48	40.1437	0.171081		27.5944	-63.1278	67.8622	0.435905		-204.261	-1553.63	44.0169	0.197641		0.857143	0.447028	1.64351	0.642567
RS59	PF3D7_0401300	rifin	19-332	36.3636		9.44842	-111.62	61.2533	0.818745		-191.959	-1475.1	45.8826	0.212784		9.31678	-111.961	61.2029	0.821385		-176.081	-1372.38	48.233	0.234422		0.875	0.441232	1.7352	0.702267
RS156	PF3D7_1040400	rifin	26-305	40.9091		-9.06256	-145.584	51.5659	0.834082		-223.554	-1658.49	40.4675	0.173996		-3.03154	-132.04	54.2515	0.942524		-215.287	-1605.05	41.699	0.18239		1.03175	0.540591	1.96914	0.924498
RS16	PF3D7_0200200	rifin	24-291	51.5152		-8.93213	-142.602	51.0878	0.834118		-185.034	-1454.95	47.7511	0.226263		31.6243	-54.0578	69.6527	0.359015		-205.013	-1550.7	43.6403	0.195528		1	0.528189	1.89326	1
RS26	PF3D7_0201300	stevor	23-178	31.8182		8.8937	-119.72	62.223	0.835717		-201.678	-1519.09	43.7895	0.197745		1.6132	-137.306	59.2089	0.971119		-205.24	-1530.06	42.8417	0.1917		0.882353	0.433086	1.79767	0.730312
RS254	PF3D7_0424400	SURFIN 4.2	595-1194	48.4848		7.88744	-105.652	58.7424	0.841098		-203.831	-1548.82	44.0126	0.197816		33.1453	-50.6291	70.3274	0.331282		-191.537	-1465.56	45.7104	0.212146		0.899038	0.473283	1.70779	0.745101
RS193	PF3D7_1254800	rifin	19-274	45.4545		-8.4537	-142.154	51.4267	0.843032		-156.63	-1370.93	55.2264	0.290079		-7.20681	-139.424	51.996	0.865204		-98.066	-1068.92	66.439	0.450521		1.01538	0.535252	1.92621	0.962724
RS206	PF3D7_1372800	stevor	21-178	37.8788		-8.65589	-148.394	52.4702	0.843996		-204.967	-1541.85	43.3535	0.194204		-22.0264	-179.089	46.6462	0.637201		-189.645	-1443.64	45.6518	0.212867		0.984	0.508592	1.9038	0.961796
RS52	PF3D7_0400500	rifin	19-339	40.9091		-8.41358	-144.109	51.8513	0.845337		-226.654	-1641.31	38.7224	0.165634		7.89158	-107.422	59.098	0.842676		-210.163	-1561.42	42.0972	0.186211		1.03175	0.540591	1.96914	0.924498
RS219	PF3D7_1400700	stevor	23-178	31.8182		8.30601	-121.143	61.9804	0.846917		-198.077	-1511.94	44.8801	0.204702		0.759758	-139.371	58.8563	0.986455		-181.414	-1401.93	47.2722	0.22593		0.882353	0.433086	1.79767	0.730312
RS170	PF3D7_1101200	rifin	26-313	42.4242		7.37099	-108.577	58.8636	0.853322		-233.935	-1733.56	39.1823	0.16524		25.2093	-68.433	66.7901	0.483133		-213.936	-1614.8	42.5265	0.186628		0.969388	0.506943	1.85369	0.92511
RS220	PF3D7_1400700	stevor	202-253	39.3939		7.42385	-111.566	59.4908	0.854856		-187.867	-1450.38	46.5504	0.218408		21.0311	-80.5105	65.4531	0.575637		-188.043	-1440.33	46.1357	0.216194		0.923077	0.475818	1.79075	0.81286
RS207	PF3D7_1372800	stevor	199-260	48.4848		7.0161	-107.597	58.352	0.859104		-227.873	-1709.6	40.5941	0.173058		32.5141	-52.0339	70.0439	0.342623		-193.348	-1494.92	46.0457	0.212865		0.899038	0.473283	1.70779	0.745101
RS68	PF3D7_0425900	rifin	19-281	45.4545		-7.46832	-139.935	51.8644	0.86048		-220.433	-1654.3	41.4712	0.179448		4.58905	-113.045	57.2708	0.908749		-207.704	-1573.42	43.4203	0.193317		1.01538	0.535252	1.92621	0.962724
RS208	PF3D7_1373000	rifin	19-293	53.0303		-7.41762	-139.166	51.7551	0.860915		-246.225	-1810.54	37.2578	0.154134		32.3108	-52.4509	69.9455	0.346169		-206.814	-1561.67	43.3493	0.193374		1	0.528189	1.89326	1
RS20	PF3D7_0200500	rifin	19-327	72.7273		6.86033	-107.345	58.1615	0.861821		-207.173	-1579.4	43.8162	0.195396		27.8966	-61.045	67.7177	0.425026		-196.119	-1495.63	45.0457	0.206482		1	0.528189	1.89326	1
RS187	PF3D7_1254300	stevor	198-262	43.9394		-7.34342	-139.637	51.9164	0.862697		-263.006	-1932.81	35.1765	0.142438		22.3324	-73.4357	65.219	0.537509		-212.909	-1620.93	43.1052	0.189671		1.07958	0.569772	2.04553	0.814349
RS159	PF3D7_1040700	rifin	19-329	43.9394		6.49414	-110.555	58.4747	0.871204		-245.764	-1812.28	37.4814	0.155116		16.2823	-88.5685	62.8323	0.667948		-215.829	-1653.76	43.1234	0.18857		0.91133	0.475848	1.74535	0.779434
RS194	PF3D7_1255000	rifin	29-119	50		-6.42423	-136.924	52.1952	0.878806		-233.272	-1716.52	38.8557	0.164112		16.283	-86.9173	62.5046	0.664522		-211.318	-1581.03	42.3457	0.186867		1	0.528189	1.89326	1
RS209	PF3D7_1373100	rifin	19-298	53.0303		-6.22842	-136.522	52.2899	0.882385		-242.619	-1786.09	37.7611	0.157049		15.0083	-89.786	61.9383	0.691555		-211.108	-1583.73	42.5155	0.187723		1	0.528189	1.89326	1
RS178	PF3D7_1200200	rifin	19-335	31.8182		6.35846	-125.861	61.1764	0.883727		-217.33	-1623.43	41.5711	0.181043		27.842	-74.0894	70.0913	0.467725		-195.254	-1489.24	45.1467	0.207415		0.882353	0.433086	1.79767	0.730312
RS248	PF3D7_0830800	SURFIN 8.2	569-1303	39.3939		5.54303	-115.913	58.6773	0.892459		-216.279	-1616.1	41.7096	0.182055		10.0591	-105.67	60.6683	0.801642		-206.684	-1554.72	43.1594	0.192547		0.923077	0.475818	1.79075	0.81286
RS7	PF3D7_0101600	rifin	19-326	86.3636		-5.45395	-135.642	52.8075	0.897002		-207.346	-1555.09	42.9267	0.191184		14.1229	-91.5302	61.495	0.709876		-192.988	-1469.95	45.3219	0.209445		1.18182	0.622044	2.24533	0.609939
RS105	PF3D7_0732500	rifin	26-329	89.3939		5.13991	-111.228	57.3994	0.897207		-206.62	-1559.98	43.3633	0.193523		26.5294	-64.1144	67.1088	0.452155		-191.617	-1464.74	45.6522	0.211812		1	0.528189	1.89326	1
RS50	PF3D7_0324800	rifin	24-328	33.3333		-5.65559	-146.911	54.7889	0.898919		-180.904	-1408.9	47.7056	0.22853		10.7504	-108.579	61.8107	0.792861		-181.772	-1402.39	47.1537	0.22509		1	0.508129	1.968	1
RS199	PF3D7_1300500	rifin	19-288	60.6061		4.38667	-112.88	57.056	0.912534		-214.609	-1605.17	41.9538	0.183789		5.86203	-109.642	57.7281	0.882437		-208.351	-1560.98	42.7564	0.189972		1	0.528189	1.89326	1
RS12	PF3D7_0115300	rifin	23-293	45.4545		-4.60374	-133.533	53.1461	0.912537		-252.255	-1860.77	36.7168	0.150551		7.92691	-105.571	58.7615	0.840287		-243.502	-1810.24	38.2309	0.158647		1.01538	0.535252	1.92621	0.962724
RS143	PF3D7_0937500	rifin	19-326	43.9394		4.40862	-115.282	57.5548	0.913323		-230.101	-1709.6	39.7839	0.168924		13.7846	-94.2475	61.7339	0.720429		-209.859	-1586.18	43.059	0.190727		0.91133	0.475848	1.74535	0.779434
RS100	PF3D7_0732200	rifin	22-140	83.3333		4.12246	-113.477	56.9391	0.917899		-231.712	-2002.62	47.6687	0.203138		40.7536	-33.4522	73.6974	0.206426		-366.908	-3001.14	29.7022	0.11068		1	0.528189	1.89326	1
RS269	PF3D7_0113600	SURFIN 1.2, pseudogene	878-1270	51.5152		4.03693	-113.646	56.8963	0.919622		-237.882	-1751.24	38.3311	0.160631		20.9331	-76.5431	64.589	0.566582		-216.108	-1603.84	41.3534	0.180545		1	0.528189	1.89326	1
RS72	PF3D7_0532900	rifin	149-275	63.6364		4.01721	-113.685	56.8865	0.920019		-197.075	-1500.21	44.8486	0.205042		43.0678	-28.2852	74.7338	0.174138		-193.246	-1471.73	45.2874	0.20914		1	0.528189	1.89326	1
RS173	PF3D7_1149800	rifin	24-271	34.8485		4.22399	-123.835	59.0188	0.920627		-207.385	-1556.95	42.9763	0.191397		21.3866	-83.756	66.3681	0.57858		-200.253	-1510.99	44.0395	0.199601		0.934783	0.473049	1.8472	0.846123
RS78	PF3D7_0617700	rifin	26-288	33.3333		-4.3689	-143.931	55.3444	0.921358		-221.658	-1643.54	40.6587	0.175481		1.65991	-129.866	57.9287	0.969179		-225.188	-1660	39.9162	0.171096		1	0.508129	1.968	1
RS74	PF3D7_0600500	rifin	23-328	24.2424		-4.75317	-163.972	58.4304	0.921555		-176.615	-1377.12	48.1992	0.23389		12.577	-120.295	65.3066	0.775609		-178.716	-1381.02	47.5477	0.229057		1.04167	0.500673	2.16722	0.913036
RS29	PF3D7_0222500	rifin	28-273	53.0303		3.69543	-114.399	56.7416	0.926528		-195.006	-1516.54	46.164	0.212586		5.00104	-111.525	57.3346	0.900034		-183.007	-1434.44	47.8032	0.227756		1	0.528189	1.89326	1
RS114	PF3D7_0832000	stevor	21-261	54.5455		3.29916	-115.323	56.572	0.934537		-223.407	-1660.02	40.5733	0.174499		20.2394	-78.2101	64.3019	0.581412		-201.259	-1519.7	43.9668	0.198783		1	0.528189	1.89326	1
RS110	PF3D7_0800500	rifin	23-332	54.5455		3.20378	-115.527	56.5274	0.936453		-236.268	-1780.54	39.8704	0.167339		20.1975	-78.2916	64.2807	0.582259		-225.047	-1684.59	40.7958	0.174881		1	0.528189	1.89326	1
RS90	PF3D7_0700300	rifin	22-135	48.4848		-3.20785	-129.764	53.64	0.938364		-183.599	-1463.69	48.5649	0.231424		5.66582	-110.035	57.6311	0.886432		-185.248	-1441.47	47.2148	0.223339		1.0625	0.561295	2.01125	0.852286
RS22	PF3D7_0200700	rifin	19-287	57.5758		-2.97085	-129.276	53.7545	0.942856		-204.027	-1547.76	43.9039	0.197213		19.2659	-80.2899	63.8471	0.601608		-189.303	-1452.33	46.0836	0.215233		1	0.528189	1.89326	1
RS124	PF3D7_0833400	rifin	24-297	57.5758		2.73771	-116.538	56.3128	0.945804		-193.067	-1519.22	46.9571	0.217609		42.0302	-30.6547	74.2795	0.188489		-212.867	-1600.95	42.4521	0.186721		1	0.528189	1.89326	1
RS31	PF3D7_0222700	rifin	26-305	54.5455		2.62172	-116.799	56.2613	0.948128		-280.548	-2044.73	32.4778	0.129815		24.6249	-68.3999	66.2624	0.490662		-204.671	-1547.8	43.6675	0.195808		1	0.528189	1.89326	1
RS166	PF3D7_1100400	rifin	23-280	34.8485		-2.75599	-140.193	56.0404	0.949961		-248.304	-1828.6	37.0966	0.152979		13.9268	-101.247	63.1866	0.72928		-248.063	-1846.03	37.7461	0.155533		0.934783	0.473049	1.8472	0.846123
RS197	PF3D7_1300200	rifin	19-305	63.6364		-2.48493	-128.199	53.9737	0.952078		-191.344	-1481.84	46.3404	0.21542		-3.19307	-129.848	53.6701	0.938681		-182.096	-1418.97	47.6104	0.227294		1	0.528189	1.89326	1
RS172	PF3D7_1101300	rifin	174-287	42.4242		2.44407	-119.655	56.6722	0.952352		-230.453	-1710.05	39.6705	0.16834		19.9407	-80.297	64.4503	0.591316		-219.6	-1639.4	41.2761	0.178901		0.969388	0.506943	1.85369	0.92511
RS57	PF3D7_0401000	rifin	22-266	50		-2.38386	-127.948	54.0138	0.953995		-243.483	-1844.02	39.3109	0.162933		13.699	-92.743	61.3585	0.719319		-235.15	-1790.05	40.5698	0.170578		1	0.528189	1.89326	1
RS236	PF3D7_0200400	stevor	202-264	33.3333		-2.49952	-139.559	56.1439	0.954547		-239.243	-1760.65	38.1474	0.15951		14.2727	-100.409	63.3292	0.722262		-217.737	-1629.73	41.6345	0.181169		1	0.508129	1.968	1
RS203	PF3D7_1300900	stevor	202-268	43.9394		2.32252	-119.967	56.6257	0.954756		-234.23	-1748.52	39.5679	0.166727		11.1261	-100.189	60.5445	0.775882		-223.419	-1679.79	41.2292	0.177316		0.91133	0.475848	1.74535	0.779434
RS96	PF3D7_0701800	rifin	23-288	39.3939		2.29042	-123.315	57.248	0.956185		-226.793	-1690.95	40.3702	0.172474		15.131	-94.0016	62.8727	0.697325		-220.136	-1646.49	41.3183	0.178889		0.923077	0.475818	1.79075	0.81286
RS180	PF3D7_1200500	rifin	19-326	51.5152		2.19575	-117.728	56.0659	0.956636		-206.283	-1555.2	43.3242	0.193488		36.6863	-42.6316	71.8953	0.270015		-195.924	-1489.45	44.905	0.205891		1	0.528189	1.89326	1
RS239	PF3D7_1301800	SURFIN 13.1, pseudogene	1644-2164	57.5758		-2.15435	-127.428	54.1151	0.958371		-239.979	-1771.82	38.2494	0.159705		14.0519	-91.9705	61.5198	0.711883		-215.986	-1623.93	42.0817	0.183823		1	0.528189	1.89326	1
RS261	PF3D7_0115000	SURFIN 1.3	853-1353	54.5455		2.01244	-118.147	55.9858	0.960293		-249.718	-1865.9	37.7879	0.155262		23.9766	-69.8289	65.9684	0.503833		-192.306	-1476.42	45.7994	0.212182		1	0.528189	1.89326	1
RS129	PF3D7_0900600	rifin	19-324	53.0303		2.01244	-118.147	55.9858	0.960293		-225.821	-1689.27	40.6688	0.174072		36.1102	-43.987	71.6508	0.27986		-192.827	-1475.04	45.5584	0.210705		1	0.528189	1.89326	1
RS128	PF3D7_0900500	rifin	26-295	51.5152		2.01244	-118.147	55.9858	0.960293		-259.645	-1885.53	34.8563	0.142018		18.6981	-81.5369	63.5887	0.613512		-239.773	-1758.81	37.8927	0.158354		1	0.528189	1.89326	1
RS192	PF3D7_1254700	rifin	19-283	34.8485		1.96618	-129.166	58.0625	0.963441		-208.177	-1563.45	42.9061	0.190735		19.2041	-88.9927	65.4591	0.622838		-193.642	-1473.12	45.188	0.208443		0.934783	0.473049	1.8472	0.846123
RS262	PF3D7_0115000	SURFIN 1.3	351-852	46.9697		1.85788	-119.095	56.0379	0.963495		-234.759	-1746.57	39.3126	0.16552		15.5934	-88.4578	62.1959	0.679124		-211.986	-1619.28	43.386	0.191339		0.955335	0.503173	1.81382	0.888908
RS210	PF3D7_1373300	rifin	28-311	60.6061		-1.66355	-126.312	54.3309	0.967767		-229.865	-1710.94	39.9148	0.169546		21.3118	-75.6741	64.7539	0.558613		-208.478	-1580.9	43.3884	0.192835		1	0.528189	1.89326	1
RS160	PF3D7_1040800	rifin	21-265	51.5152		-1.4678	-125.88	54.4196	0.971532		-219.354	-1631.93	41.1137	0.178283		-2.11981	-127.356	54.1316	0.959032		-171.571	-1383.58	50.2886	0.248831		1	0.528189	1.89326	1
RS34	PF3D7_0223100	rifin	28-141	51.5152		-1.38992	-125.712	54.4555	0.973032		-239.622	-1770.16	38.3242	0.160104		21.5762	-75.0933	64.8742	0.55313		-199.352	-1506.7	44.2261	0.200922		1	0.528189	1.89326	1
RS93	PF3D7_0700400	stevor	198-260	50		-1.08399	-125.02	54.5909	0.978933		-176.659	-1437.08	50.2043	0.244804		15.5014	-88.6592	62.1539	0.681065		-166.46	-1363.52	51.4861	0.259453		1	0.528189	1.89326	1
RS204	PF3D7_1372600	rifin	17-242	50		1.07113	-120.245	55.5634	0.97896		-240.66	-1777.83	38.2005	0.159319		17.9593	-83.2121	63.2629	0.62916		-220.773	-1653.63	41.3243	0.178682		1	0.528189	1.89326	1
RS162	PF3D7_1041000	rifin	21-327	63.6364		-1.03554	-124.952	54.6206	0.979874		-157.221	-1343.41	54.1624	0.283021		21.3155	-75.7045	64.7633	0.558642		-171.152	-1382.48	50.4051	0.249787		1	0.528189	1.89326	1
RS60	PF3D7_0401400	rifin	24-286	25.7576		-1.14443	-154.844	59.857	0.980745		-196.506	-1499.34	45.0302	0.206213		-8.81744	-174.214	56.8176	0.857784		-180.673	-1400.75	47.5079	0.227627		0.960784	0.45788	2.01604	0.915745
RS145	PF3D7_1000200	rifin	19-328	30.303		-0.902641	-143.364	58.1641	0.98404		-226.955	-1685.11	40.1159	0.171346		11.2204	-114.171	63.1985	0.791099		-226.507	-1683.04	40.2107	0.171896		0.947059	0.467241	1.91961	0.880058
RS115	PF3D7_0832400	stevor	23-179	57.5758		-0.738471	-124.282	54.7523	0.985625		-210.793	-1593.35	42.9579	0.189872		22.439	-73.2311	65.2735	0.535398		-194.63	-1483.29	45.173	0.207862		1	0.528189	1.89326	1
RS157	PF3D7_1040500	rifin	19-307	37.8788		0.695723	-126.938	56.5461	0.986791		-233.578	-1735.93	39.3909	0.166204		29.5364	-61.0751	69.1752	0.406601		-198.625	-1518.54	44.9025	0.204542		0.984	0.508592	1.9038	0.961796
RS1	PF3D7_0100200	rifin	19-288	69.697		0.471638	-121.578	55.2938	0.990763		-194.741	-1478.83	44.9768	0.206839		17.2618	-84.7462	62.9459	0.643844		-177.632	-1375.53	47.7616	0.230885		1	0.528189	1.89326	1
RS76	PF3D7_0617600	stevor	23-177	16.6667		0.538449	-191.043	66.0099	0.992137		-197.135	-1509.41	45.142	0.206446		20.7945	-131.802	72.9359	0.670474		-192.769	-1481.53	45.8033	0.211957		1	0.424701	2.3546	1
RS234	PF3D7_1480000	rifin	19-297	42.4242		-0.343111	-125.934	55.435	0.993401		-214.987	-1614.87	42.1435	0.18449		16.9064	-87.1371	63.1044	0.654801		-198.583	-1509.63	44.6135	0.203161		0.969388	0.506943	1.85369	0.92511
RS56	PF3D7_0400900	rifin	19-286	25.7576		0.287894	-151.243	60.4267	0.995121		-166.379	-1334.59	50.5377	0.254077		6.78476	-134.902	63.0098	0.881562		-157.692	-1268.25	51.4673	0.266453		0.960784	0.45788	2.01604	0.915745
RS4	PF3D7_0100800	rifin	19-301	74.2424		-0.0742749	-122.78	55.046	0.998549		-105.801	-1137.1	65.7635	0.430302		22.206	-73.7141	65.1617	0.540118		-107.544	-1171.9	66.1338	0.429882		1	0.528189	1.89326	1

## Sheet: Table S3
Table S3:	Antigens included in the combination analysis arranged sequentially
Product ID	GeneID	Product Description	Expressed region	Order of addition to the combination
RS23	PF3D7_0201000	rifin	21-113	1
RS189	PF3D7_1254500	rifin	21-269	2
RS264	PF3D7_0113600	SURFIN 1.2, pseudogene	636-1270	3
RS163	PF3D7_1041100	rifin	24-291	4
RS158	PF3D7_1040600	rifin	28-283	5
RS99	PF3D7_0732000	stevor	198-256	6
RS89	PF3D7_0700200	rifin	23-280	7
RS141	PF3D7_0937300	rifin	20-308	8
RS186	PF3D7_1254300	stevor	23-177	9
RS233	PF3D7_1479900	stevor	202-264	10
RS106	PF3D7_0732700	rifin	27-118	11
RS45	PF3D7_0324400	rifin	182-306	12
RS242	PF3D7_1477600	SURFIN 14.1	905-1442	13
RS37	PF3D7_0223400	rifin	19-284	14
RS92	PF3D7_0700400	stevor	24-174	15
RS253	PF3D7_0424400	SURFIN 4.2	1195-1796	16
RS130	PF3D7_0900700	rifin	24-338	17
RS256	PF3D7_0402200	SURFIN 4.1, pseudogene	1605-2219	18
RS25	PF3D7_0201200	rifin	23-313	19
RS13	PF3D7_0115400	stevor	23-178	20
RS95	PF3D7_0701100	rifin	19-286	21
